# Supplementary material for: Long-term historical trends in air pollutant emissions in Asia: Regional Emission inventory in ASia (REAS) version 3.1
Source: Copernicus journal article supplement (doi:10.5194/acp-2019-1122), 2019-12-20
Supplement: Supplementary file 1 [file acp-2019-1122-supplement.pdf]

*Supplemental of*

**Long-term historical trends in air pollutant emissions in Asia:  
Regional Emission inventory in ASia (REAS) version 3.1**

**Junichi Kurokawa and Toshimasa Ohara**

5 *Correspondence to:* Junichi Kurokawa (kurokawa@acap.asia)

## Supplement Figures

**Figures S1, S3, S5, S7, S9, and S11** show emissions of (a) SO<sub>2</sub>, (b) NO<sub>x</sub>, (c) CO, (d) CO<sub>2</sub>, (e) PM<sub>10</sub>, (f) PM<sub>2.5</sub>, (g) BC, (h) OC, (i) NMVOC, and (j) NH<sub>3</sub> from major sectors during 1950-2015 in China, India, Japan, Southeast Asia (SEA), East Asia other than China and Japan (OEA), and South Asia other than India (OSA), respectively. (Sectors for (a)-(h): PP = Power plants, IND = Industry, ROAD = Road transport, OTRA = Other transport, RESI = Residential, and ODOM = Other domestic; Sectors for (i): CMB = Combustion, ROAD = Road transport (including both tail pipe and evaporative emissions), INDPRC = Industrial processes, EXT = Extraction processes, PAINT = Paint use, SLV = Solvent use, and WST = Waste treatment; Sectors for (j): CMB = Combustion, MM = Manure management, FER = Fertilizer application, HUMAN = Human perspiration and respiration, and LTRN = Latrines, INDPRC = Industrial processes.)

**Figures S2, S4, S6, S8, S10, and S12** provide emissions of (a) SO<sub>2</sub>, (b) NO<sub>x</sub>, (c) CO, (d) CO<sub>2</sub>, (e) PM<sub>10</sub>, (f) PM<sub>2.5</sub>, (g) BC, (h) OC, (i) NMVOC, and (j) NH<sub>3</sub> from each fuel type during 1950-2015 in China, India, Japan, SEA, OEA, and OSA, respectively. Emissions from non-combustion sources are not included in (i) NMVOC and (j) NH<sub>3</sub> to show contributions from fuel types clearly because majority of their emissions are from non-combustion sources. In Japan, emissions from cement production were estimated not by fuel consumption, but based on production amounts of cement in each kiln type. Therefore, contributions from total emissions from cement kiln combustion are included in CEMK (see below). For brick and lime production, all emissions estimated based on production amounts are included in NCMB (see below) (Fuel types: COAL = Primary coal, DC = Secondary coal, NGAS = Natural gas, OGAS = Other gas fuels, LF = Light oil fuels, MD = Diesel oil, HF = Heavy oil fuels, BF = Biofuels, OTH = Other fuels, NCMB = Non-combustion sources, and CEMK = combustion emissions from cement kilns (only for Japan))

**Figure S13** illustrates grid maps of annual emissions of CO<sub>2</sub> and PM<sub>10</sub> in 1965 and 2015.

**Figures S14 and S15** compare CO, NMVOC, NH<sub>3</sub>, PM<sub>10</sub>, PM<sub>2.5</sub>, and OC emissions in REASv3.1 with other published estimates for China and India, respectively.

**Figures S16-S19** compare emissions of SO<sub>2</sub>, NO<sub>x</sub>, BC, CO, NMVOC, NH<sub>3</sub>, PM<sub>10</sub>, PM<sub>2.5</sub>, and OC in REASv3.1 with other published estimates for Japan, SEA, OEA, and OSA, respectively.

**Figures S20** compares relative ratios of emissions from China, India, Japan, SEA, OEA, and OSA for CO, NMVOC, NH<sub>3</sub>, PM<sub>10</sub>, PM<sub>2.5</sub>, and OC among REASv3.1, CEDS, and EDGARv4.3.2.

# China Sector

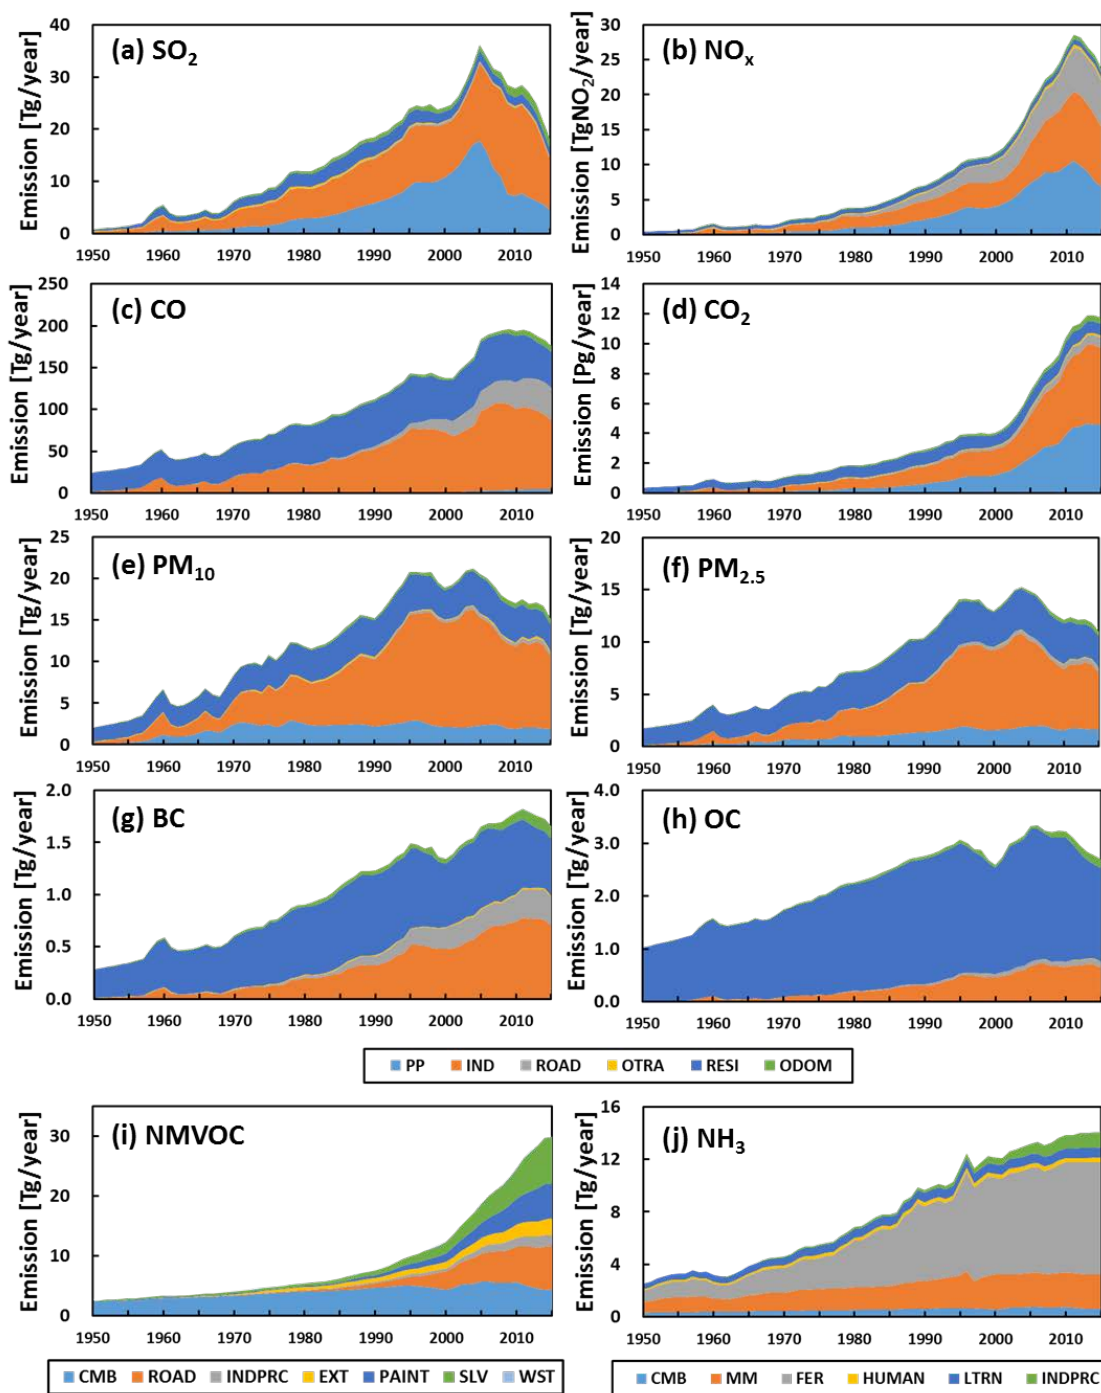

Figure S1: Emissions of (a)  $\text{SO}_2$ , (b)  $\text{NO}_x$ , (c) CO, (d)  $\text{CO}_2$ , (e)  $\text{PM}_{10}$ , (f)  $\text{PM}_{2.5}$ , (g) BC, (h) OC, (i) NMVOC, and (j)  $\text{NH}_3$  from major sectors in China from 1950 to 2015.

## China Fuel

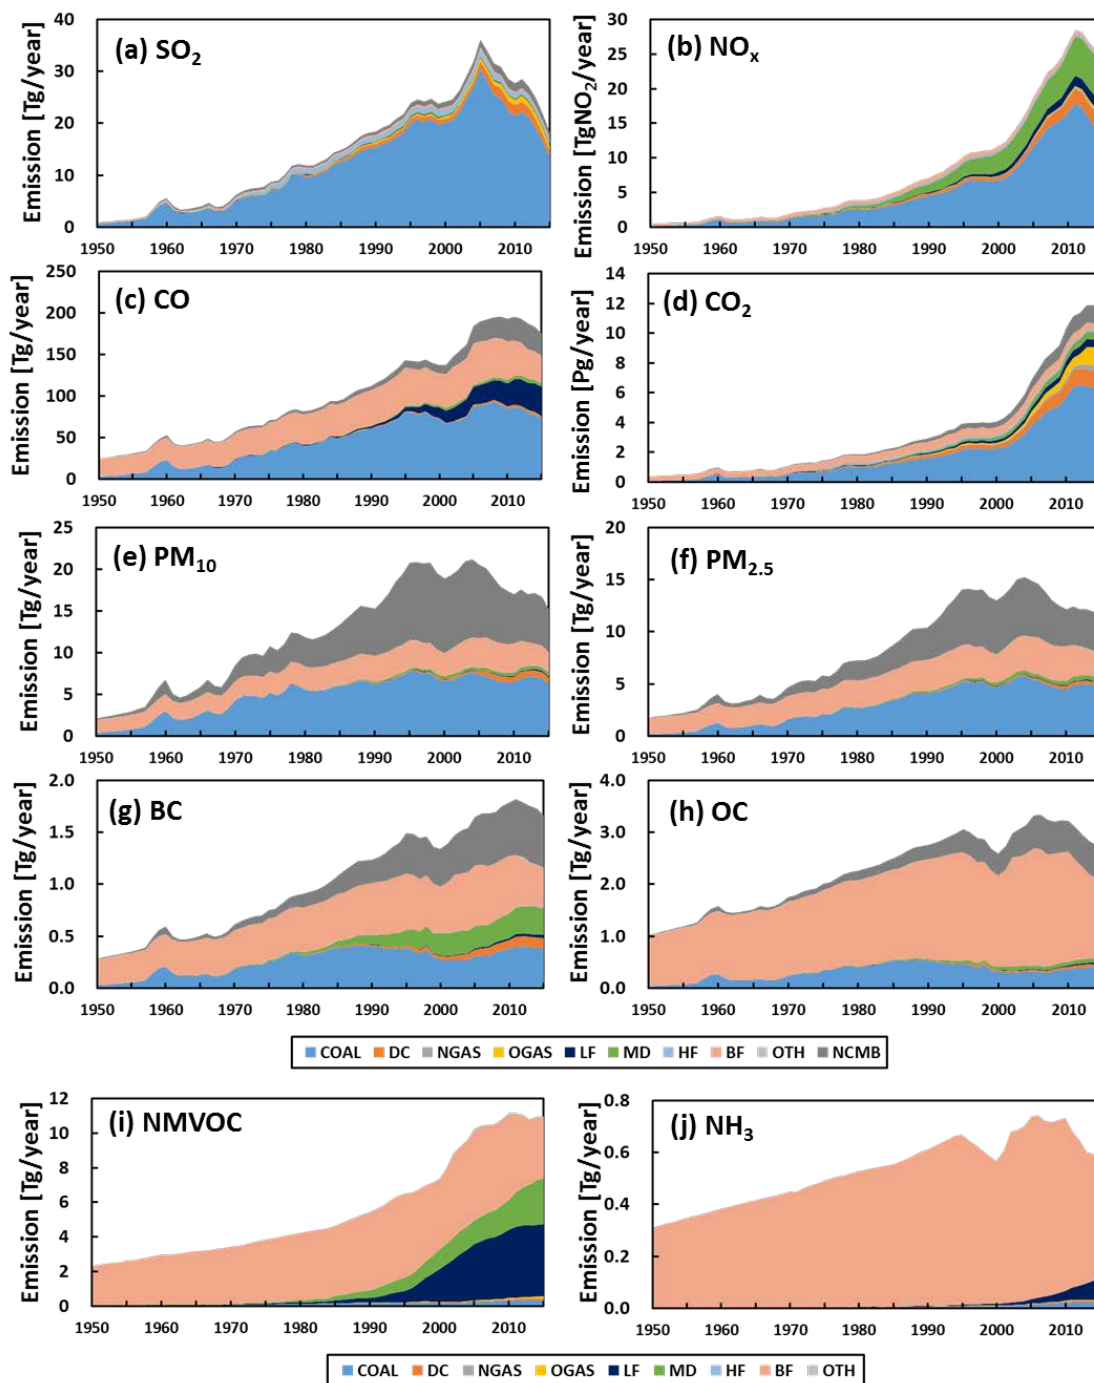

40 Figure S2: Emissions of (a) SO<sub>2</sub>, (b) NO<sub>x</sub>, (c) CO, (d) CO<sub>2</sub>, (e) PM<sub>10</sub>, (f) PM<sub>2.5</sub>, (g) BC, (h) OC, (i) NMVOC, and (j) NH<sub>3</sub> from each fuel type in China from 1950 to 2015.

# India Sector

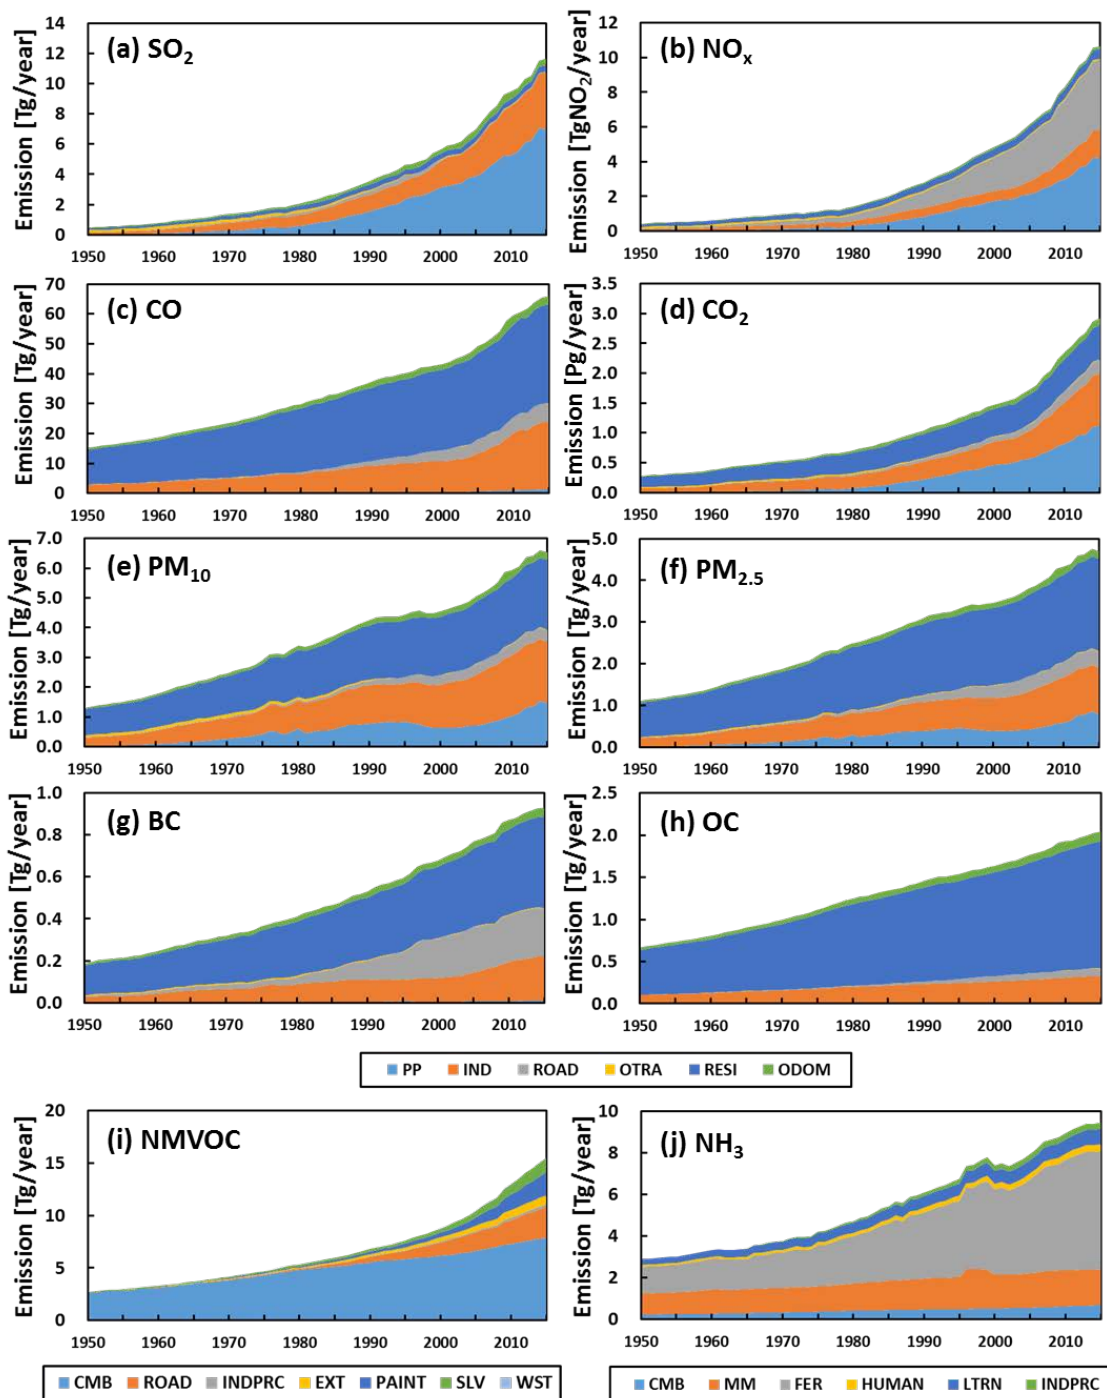

Figure S3: Emissions of (a) SO<sub>2</sub>, (b) NO<sub>x</sub>, (c) CO, (d) CO<sub>2</sub>, (e) PM<sub>10</sub>, (f) PM<sub>2.5</sub>, (g) BC, (h) OC, (i) NMVOC, and (j) NH<sub>3</sub> from major sectors in India from 1950 to 2015.

## India Fuel

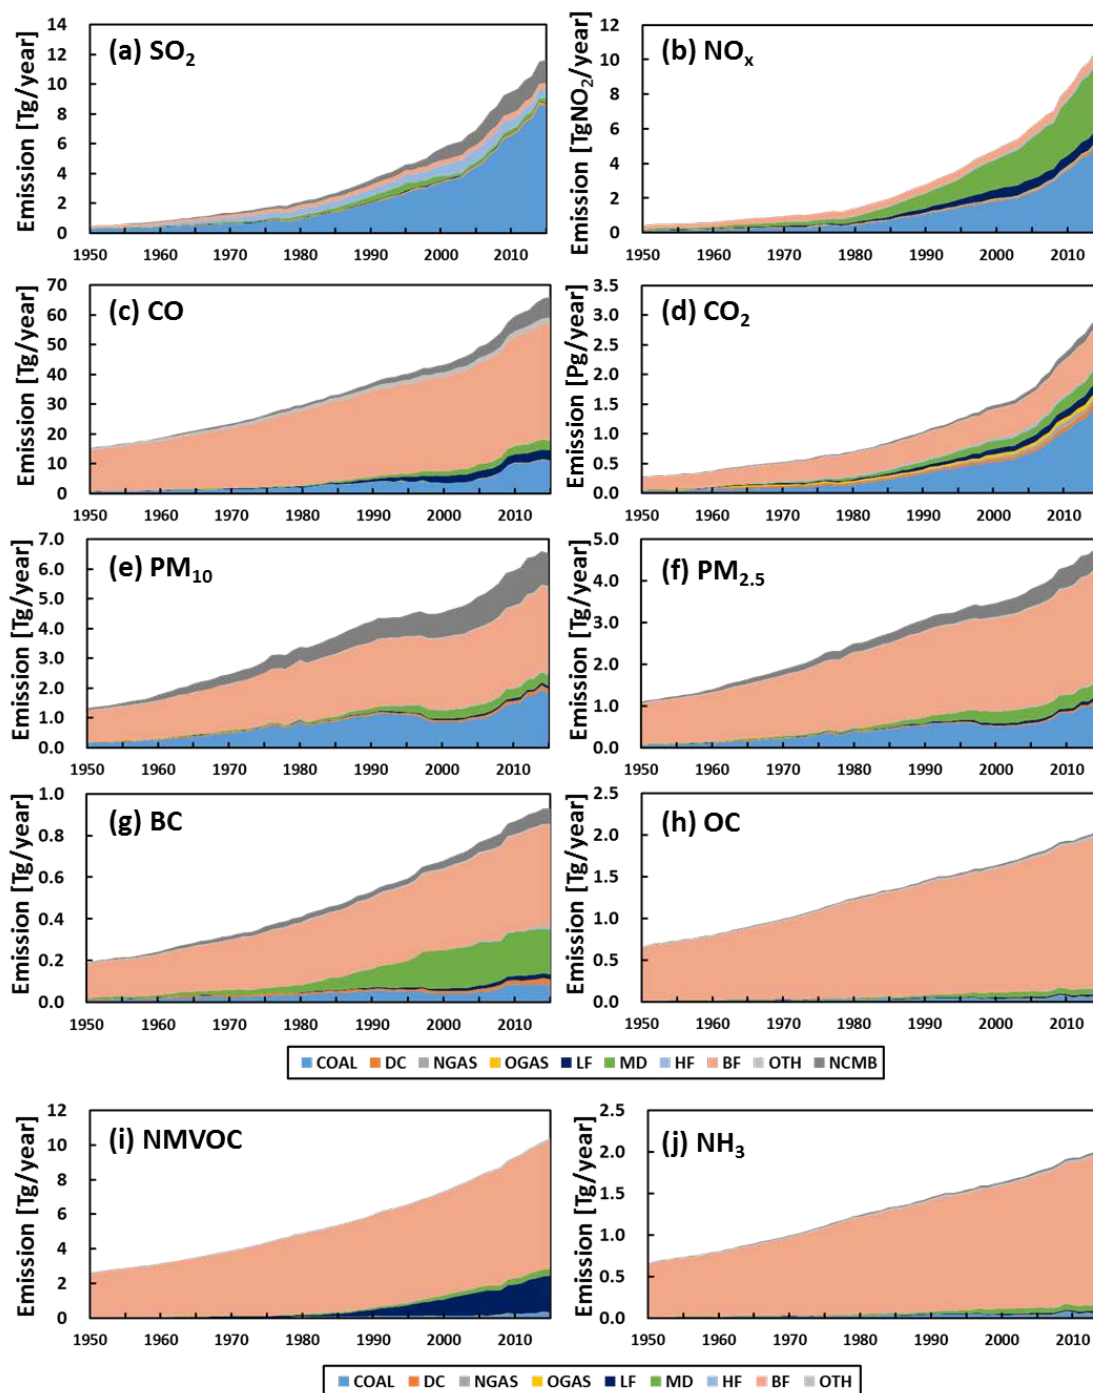

45 Figure S4: Emissions of (a) SO<sub>2</sub>, (b) NO<sub>x</sub>, (c) CO, (d) CO<sub>2</sub>, (e) PM<sub>10</sub>, (f) PM<sub>2.5</sub>, (g) BC, (h) OC, (i) NMVOC, and (j) NH<sub>3</sub> from each fuel type in India from 1950 to 2015.

# Japan Sector

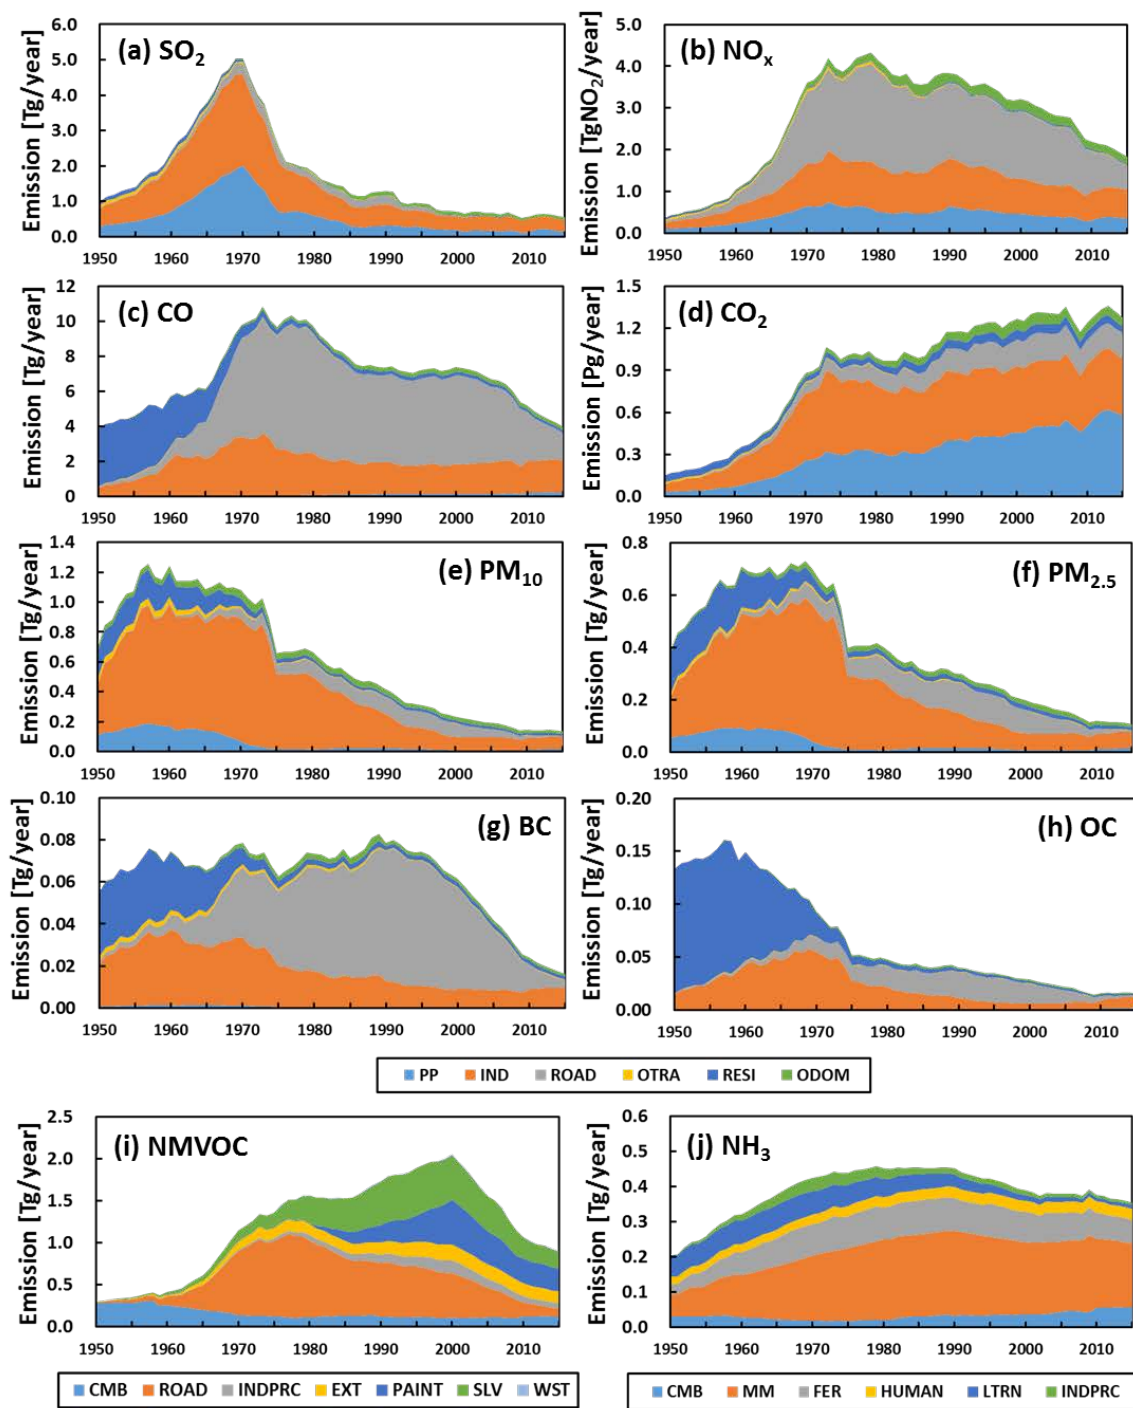

Figure S5: Emissions of (a) SO<sub>2</sub>, (b) NO<sub>x</sub>, (c) CO, (d) CO<sub>2</sub>, (e) PM<sub>10</sub>, (f) PM<sub>2.5</sub>, (g) BC, (h) OC, (i) NMVOC, and (j) NH<sub>3</sub> from major sectors in Japan from 1950 to 2015.

# Japan Fuel

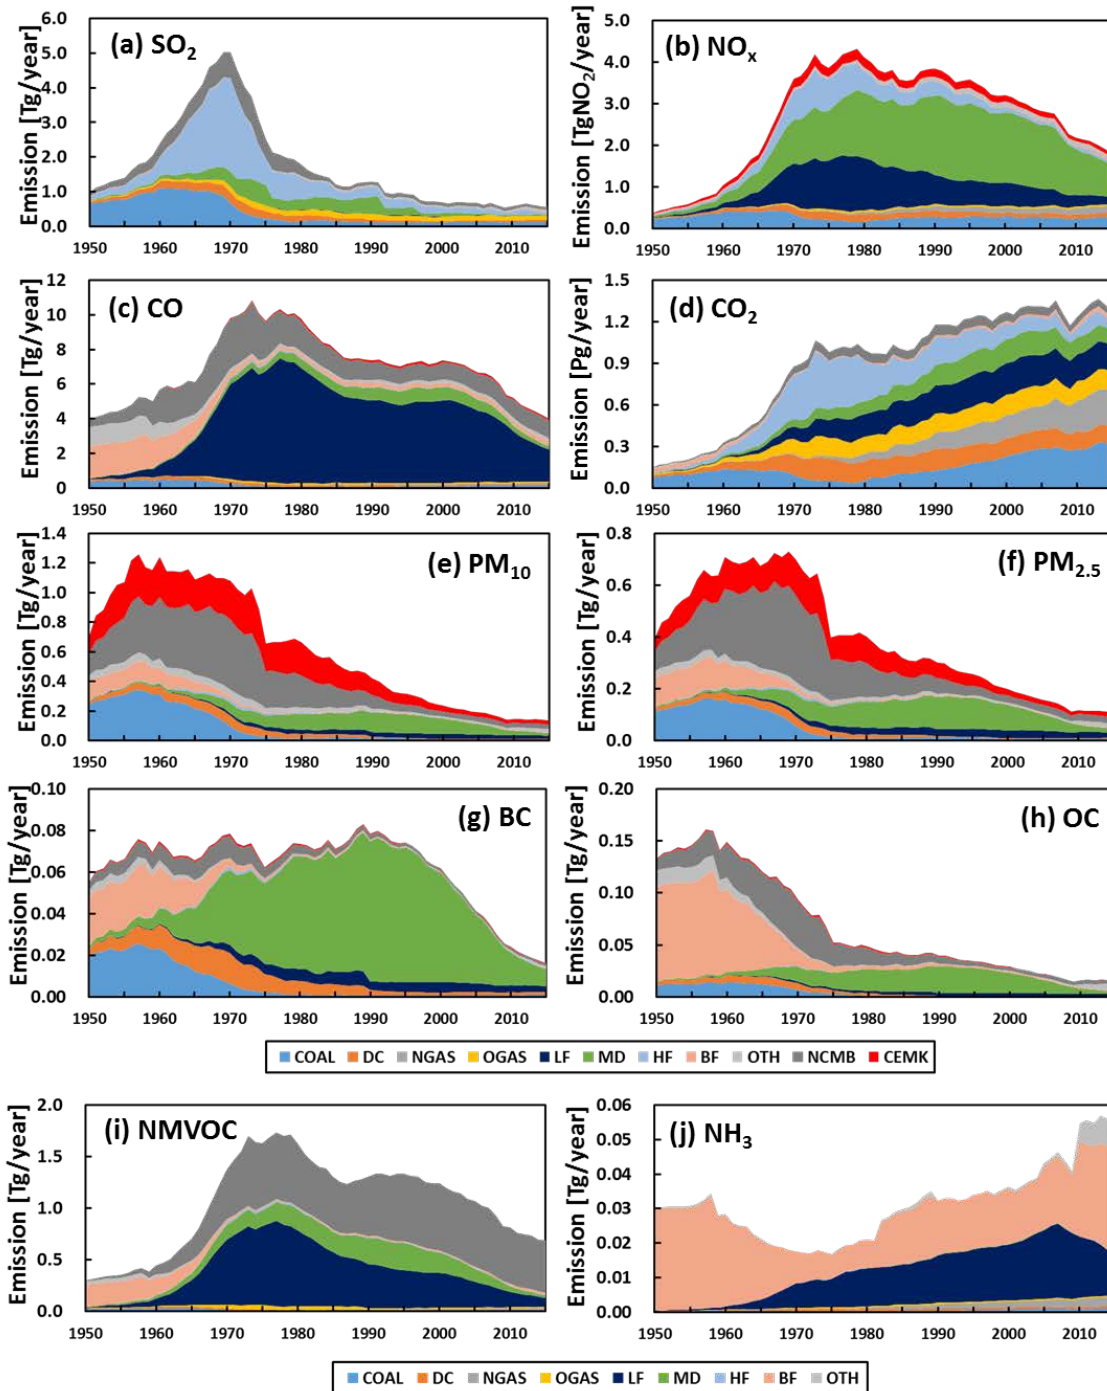

50

Figure S6: Emissions of (a)  $\text{SO}_2$ , (b)  $\text{NO}_x$ , (c) CO, (d)  $\text{CO}_2$ , (e)  $\text{PM}_{10}$ , (f)  $\text{PM}_{2.5}$ , (g) BC, (h) OC, (i) NMVOC, and (j)  $\text{NH}_3$  from each fuel type in Japan from 1950 to 2015.



## SEA Sector

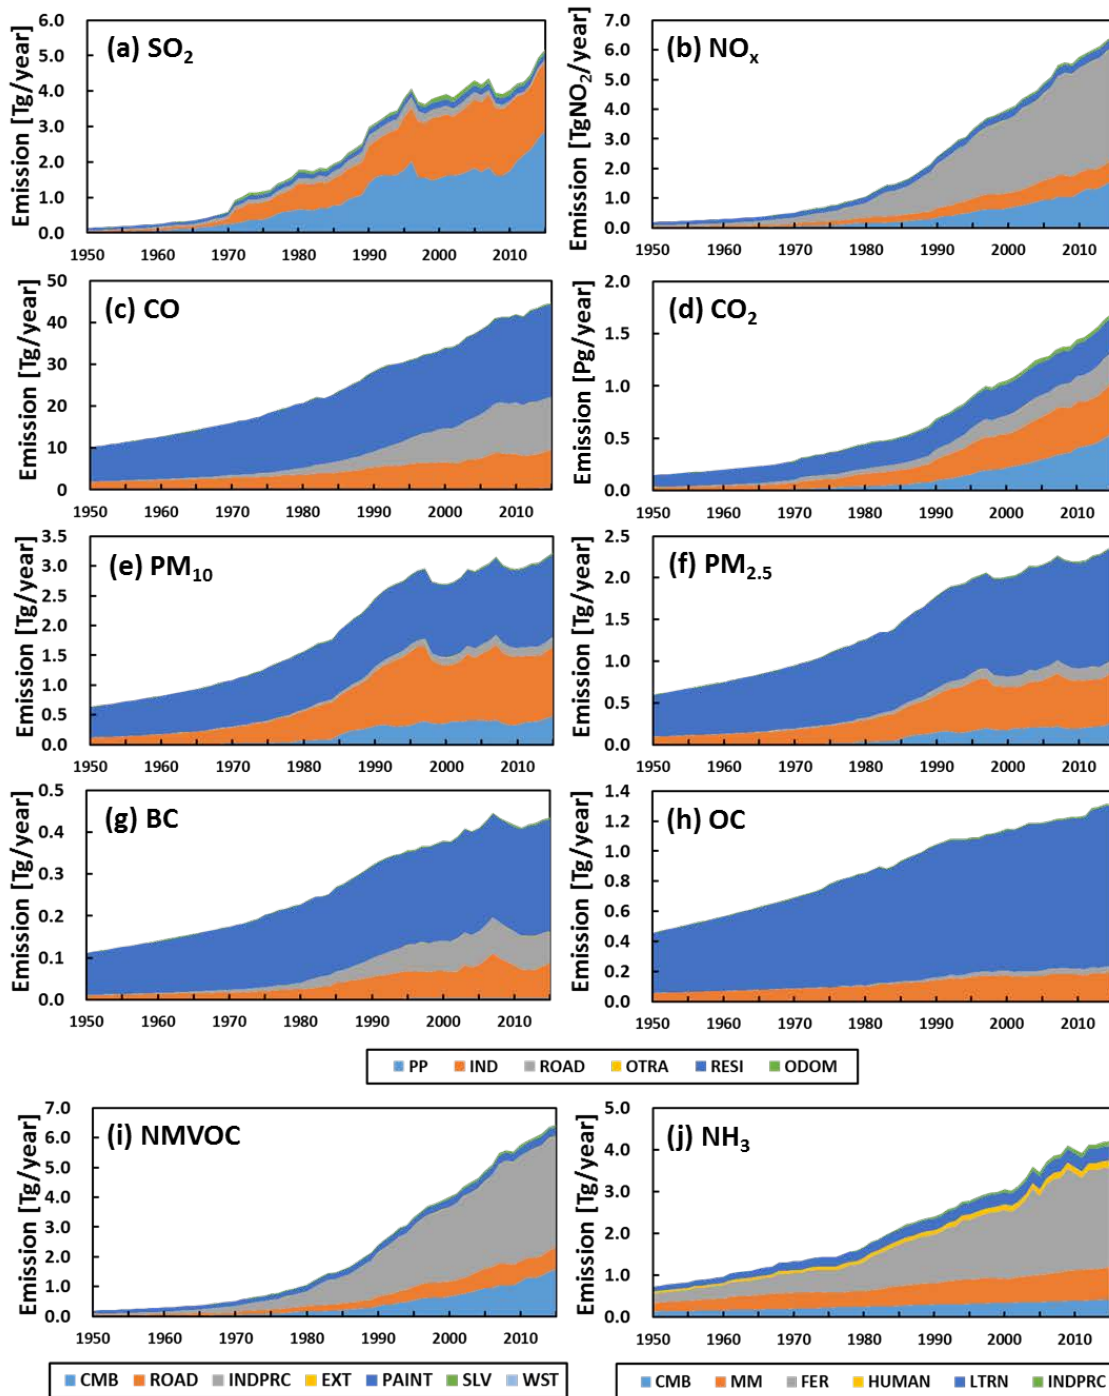

Figure S7: Emissions of (a) SO<sub>2</sub>, (b) NO<sub>x</sub>, (c) CO, (d) CO<sub>2</sub>, (e) PM<sub>10</sub>, (f) PM<sub>2.5</sub>, (g) BC, (h) OC, (i) NMVOC, and (j) NH<sub>3</sub> from major sectors in SEA from 1950 to 2015.

## SEA Fuel

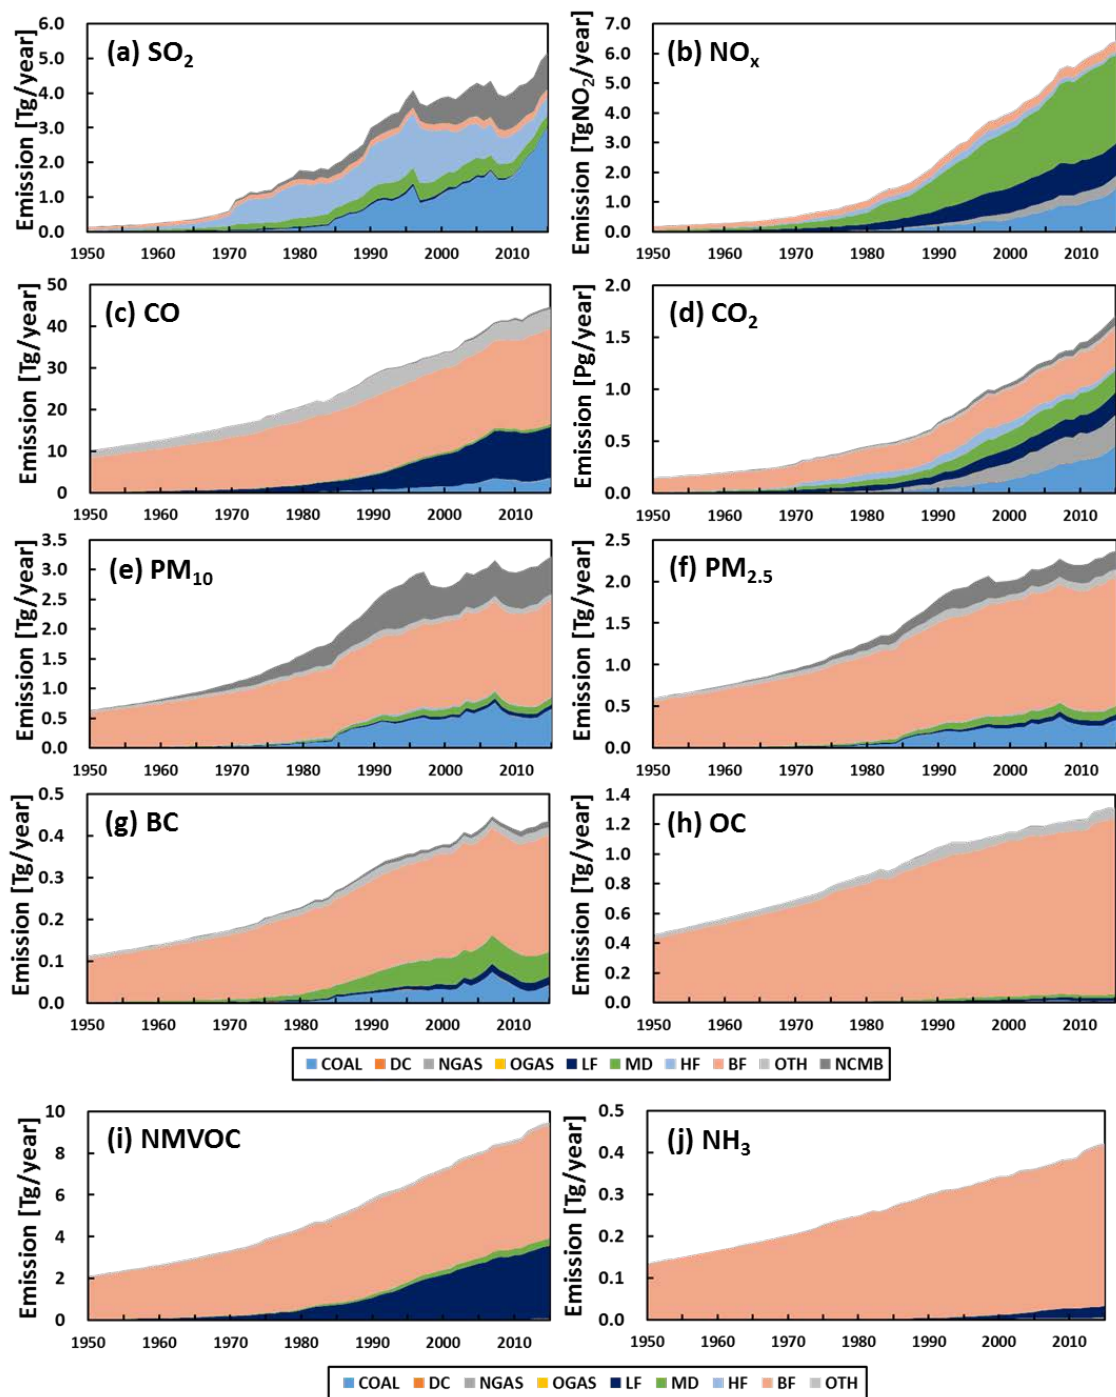

Figure S8: Emissions of (a) SO<sub>2</sub>, (b) NO<sub>x</sub>, (c) CO, (d) CO<sub>2</sub>, (e) PM<sub>10</sub>, (f) PM<sub>2.5</sub>, (g) BC, (h) OC, (i) NMVOC, and (j) NH<sub>3</sub> from each fuel type in SEA from 1950 to 2015.

## OEA Sector

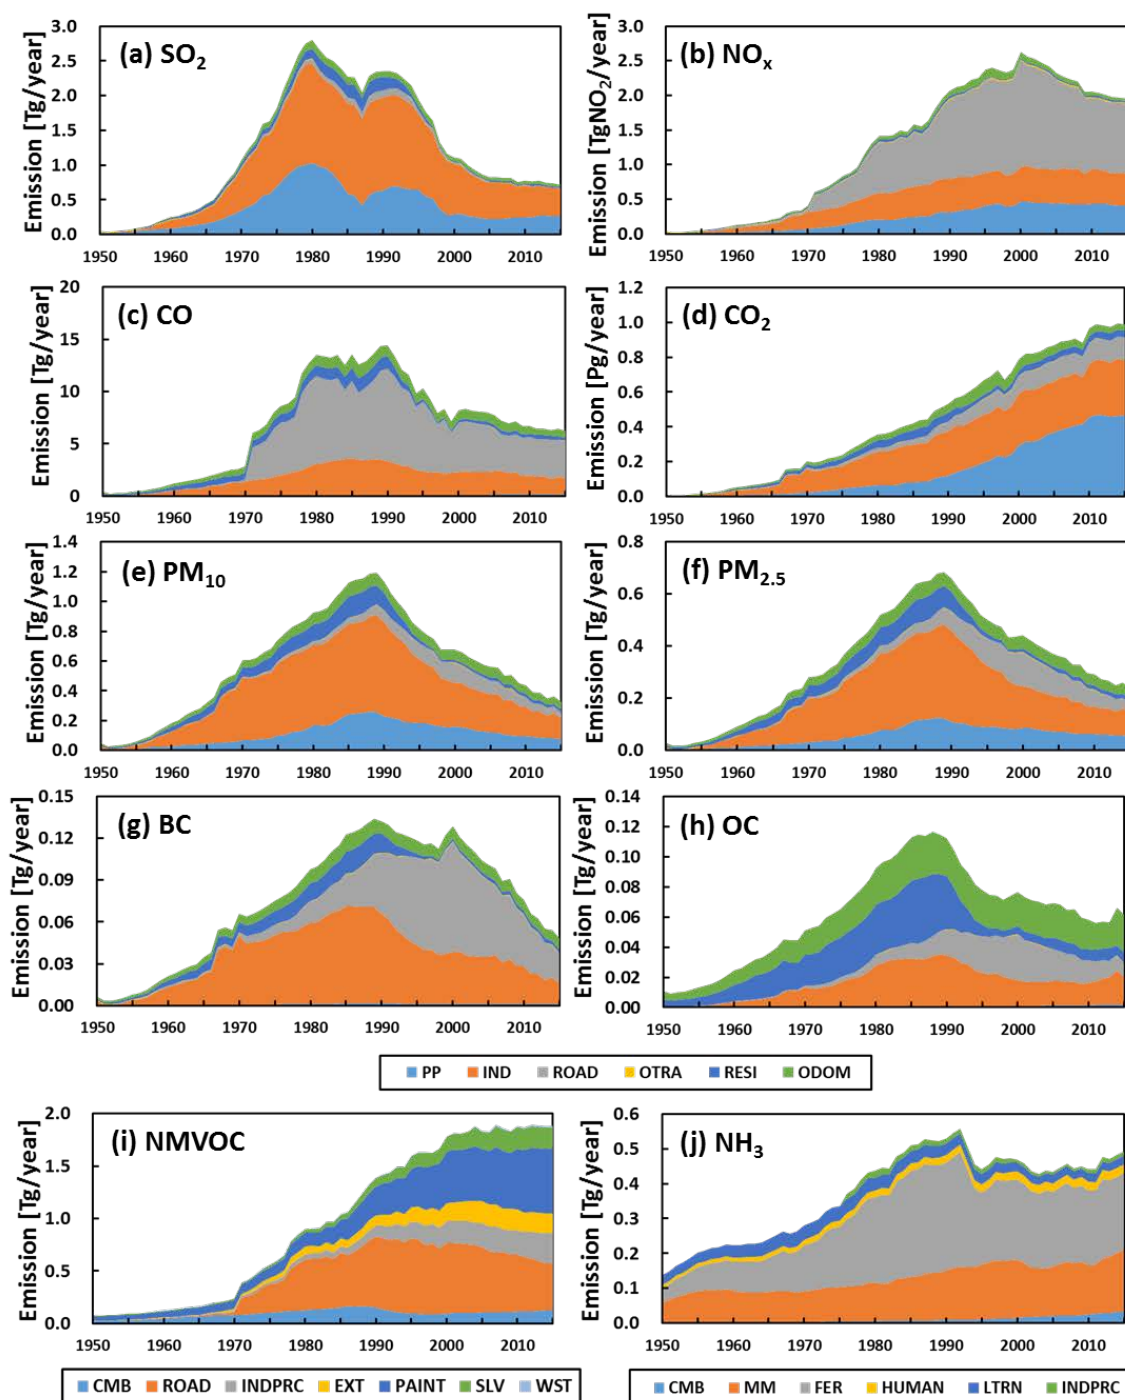

60 Figure S9: Emissions of (a) SO<sub>2</sub>, (b) NO<sub>x</sub>, (c) CO, (d) CO<sub>2</sub>, (e) PM<sub>10</sub>, (f) PM<sub>2.5</sub>, (g) BC, (h) OC, (i) NMVOC, and (j) NH<sub>3</sub> from major sectors in OEA from 1950 to 2015.

## OEA Fuel

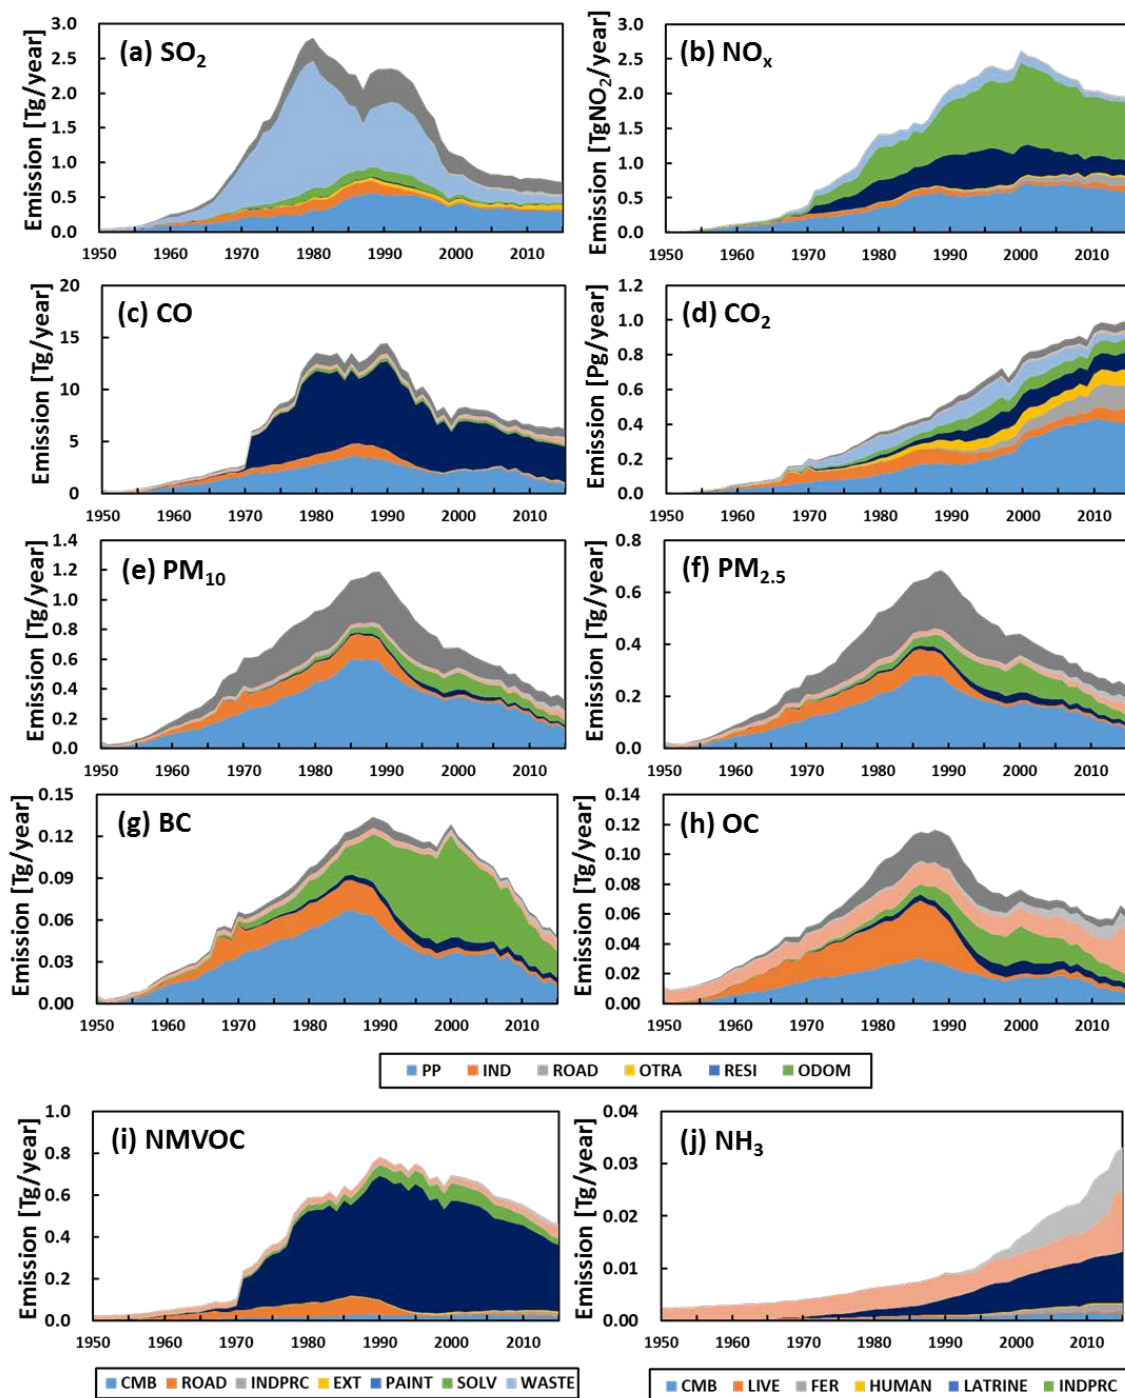

Figure S10: Emissions of (a)  $\text{SO}_2$ , (b)  $\text{NO}_x$ , (c) CO, (d)  $\text{CO}_2$ , (e)  $\text{PM}_{10}$ , (f)  $\text{PM}_{2.5}$ , (g) BC, (h) OC, (i) NMVOC, and (j)  $\text{NH}_3$  from each fuel type in OEA from 1950 to 2015.

# OSA Sector

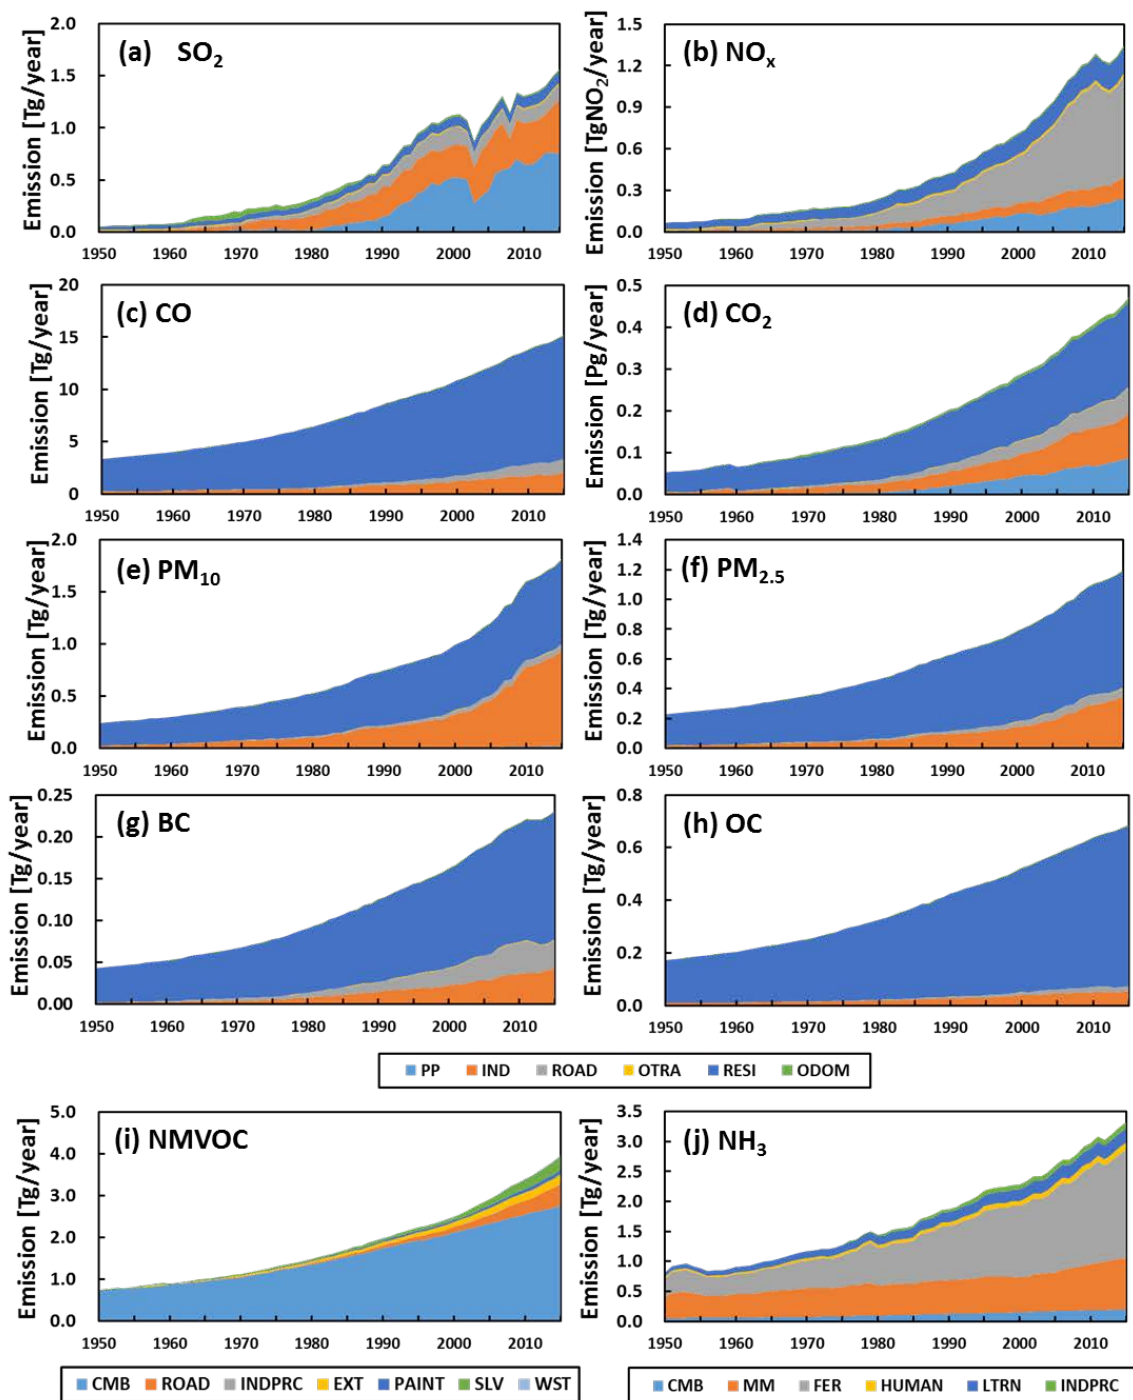

65

Figure S11: Emissions of (a) SO<sub>2</sub>, (b) NO<sub>x</sub>, (c) CO, (d) CO<sub>2</sub>, (e) PM<sub>10</sub>, (f) PM<sub>2.5</sub>, (g) BC, (h) OC, (i) NMVOC, and (j) NH<sub>3</sub> from major sectors in OSA from 1950 to 2015.

# OSA Fuel

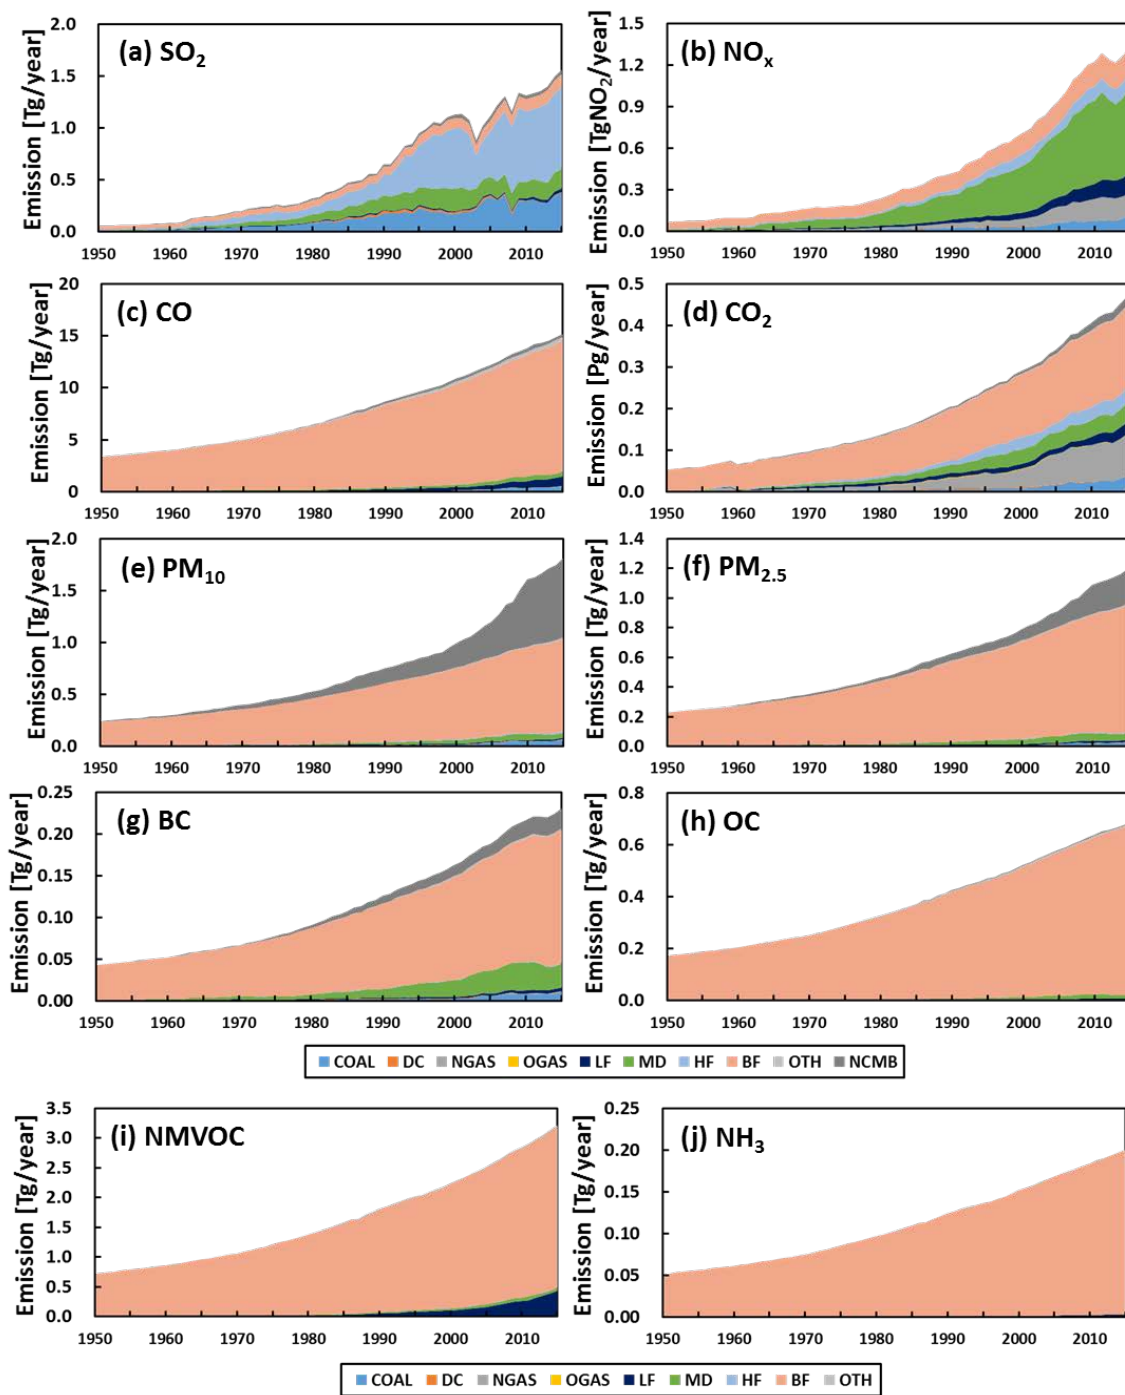

70 Figure S12: Emissions of (a)  $\text{SO}_2$ , (b)  $\text{NO}_x$ , (c)  $\text{CO}$ , (d)  $\text{CO}_2$ , (e)  $\text{PM}_{10}$ , (f)  $\text{PM}_{2.5}$ , (g)  $\text{BC}$ , (h)  $\text{OC}$ , (i)  $\text{NMVOC}$ , and (j)  $\text{NH}_3$  from each fuel type in OSA from 1950 to 2015.

(a) CO<sub>2</sub> in 1965

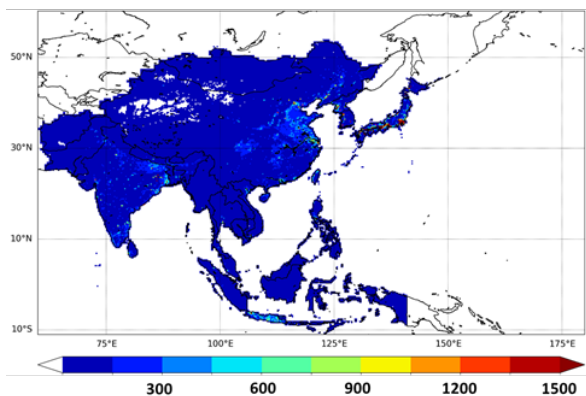

(b) CO<sub>2</sub> in 2015

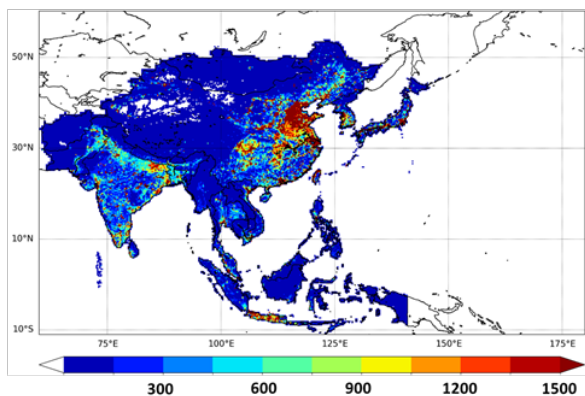

(c) PM<sub>10</sub> in 1965

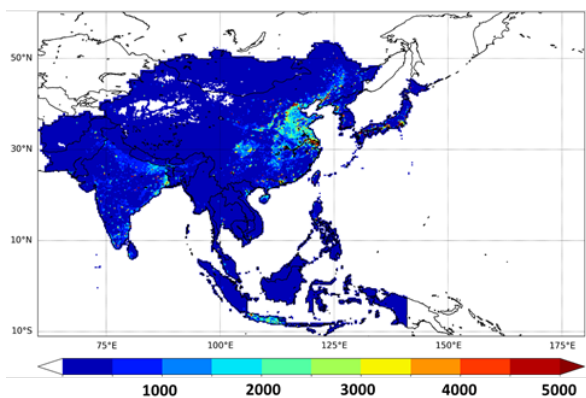

(d) PM<sub>10</sub> in 2015

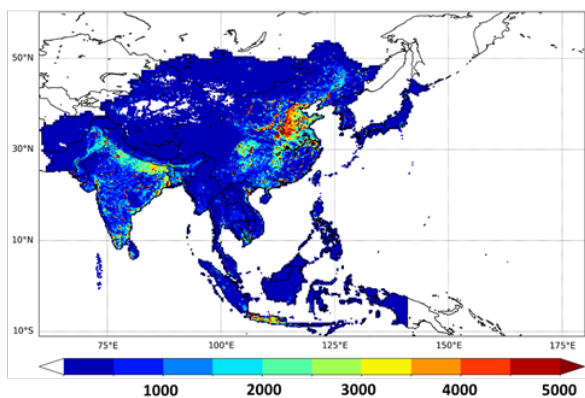

Figure S13: Grid maps of annual emissions of (a, c) CO<sub>2</sub> (kt year<sup>-1</sup> per grid cell) and (b, d) PM<sub>10</sub> (t year<sup>-1</sup> per grid cell) in 1965 (left) and 2015 (right).

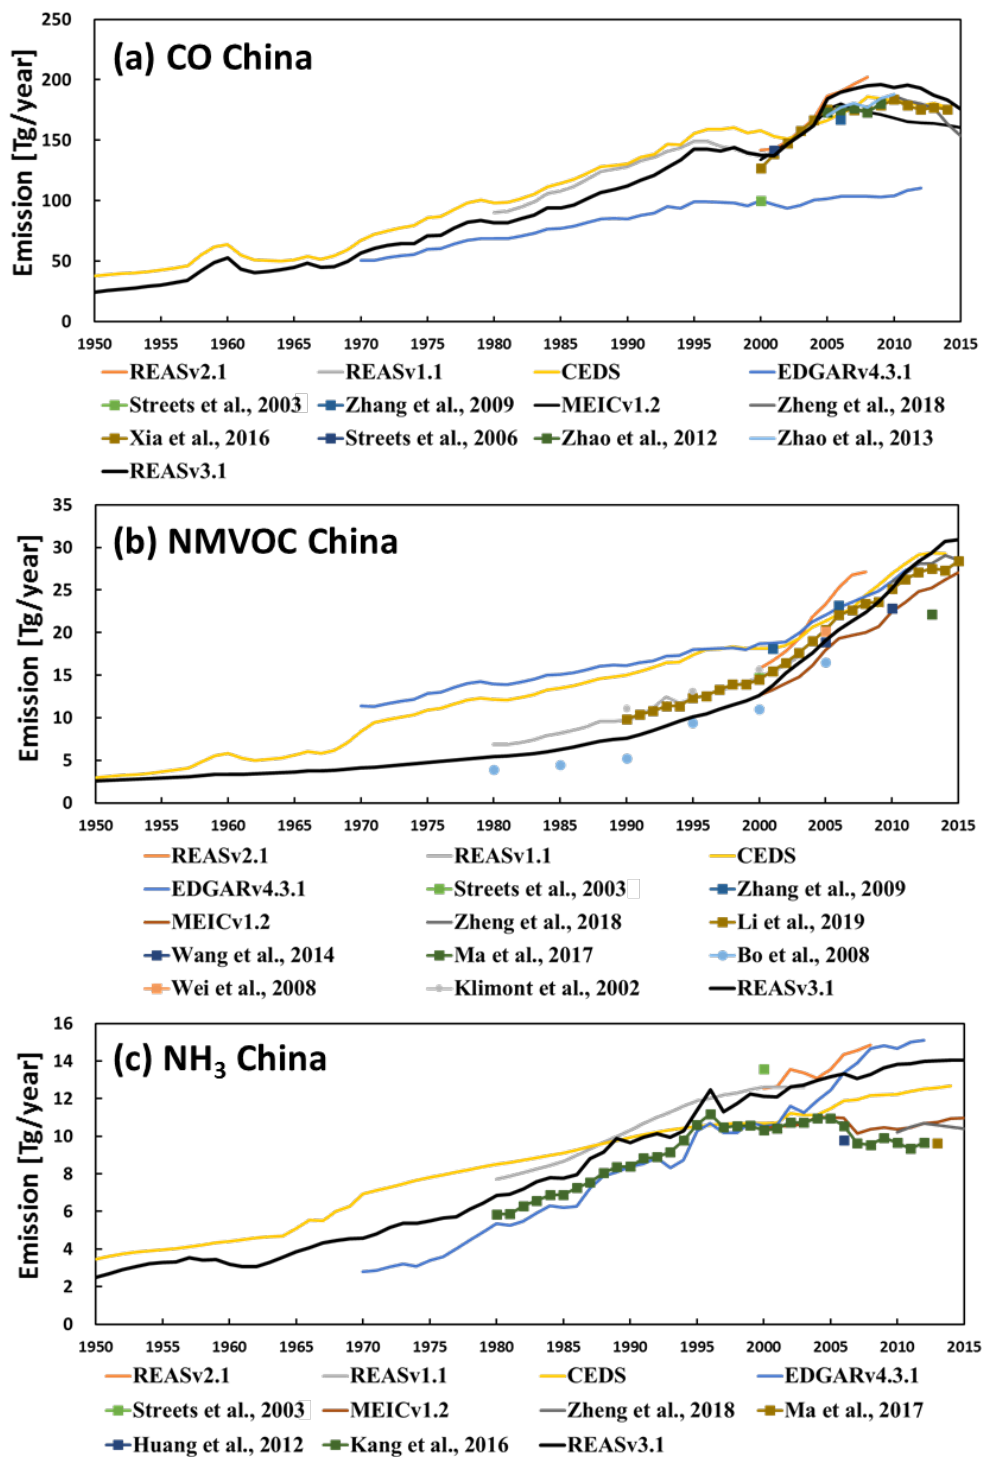

75

Figure S14: Comparison of (a) CO, (b) NMVOC, (c) NH<sub>3</sub>, (d) PM<sub>10</sub>, (e) PM<sub>2.5</sub> and (f) BC emissions in China between REASv3.1 and other studies.



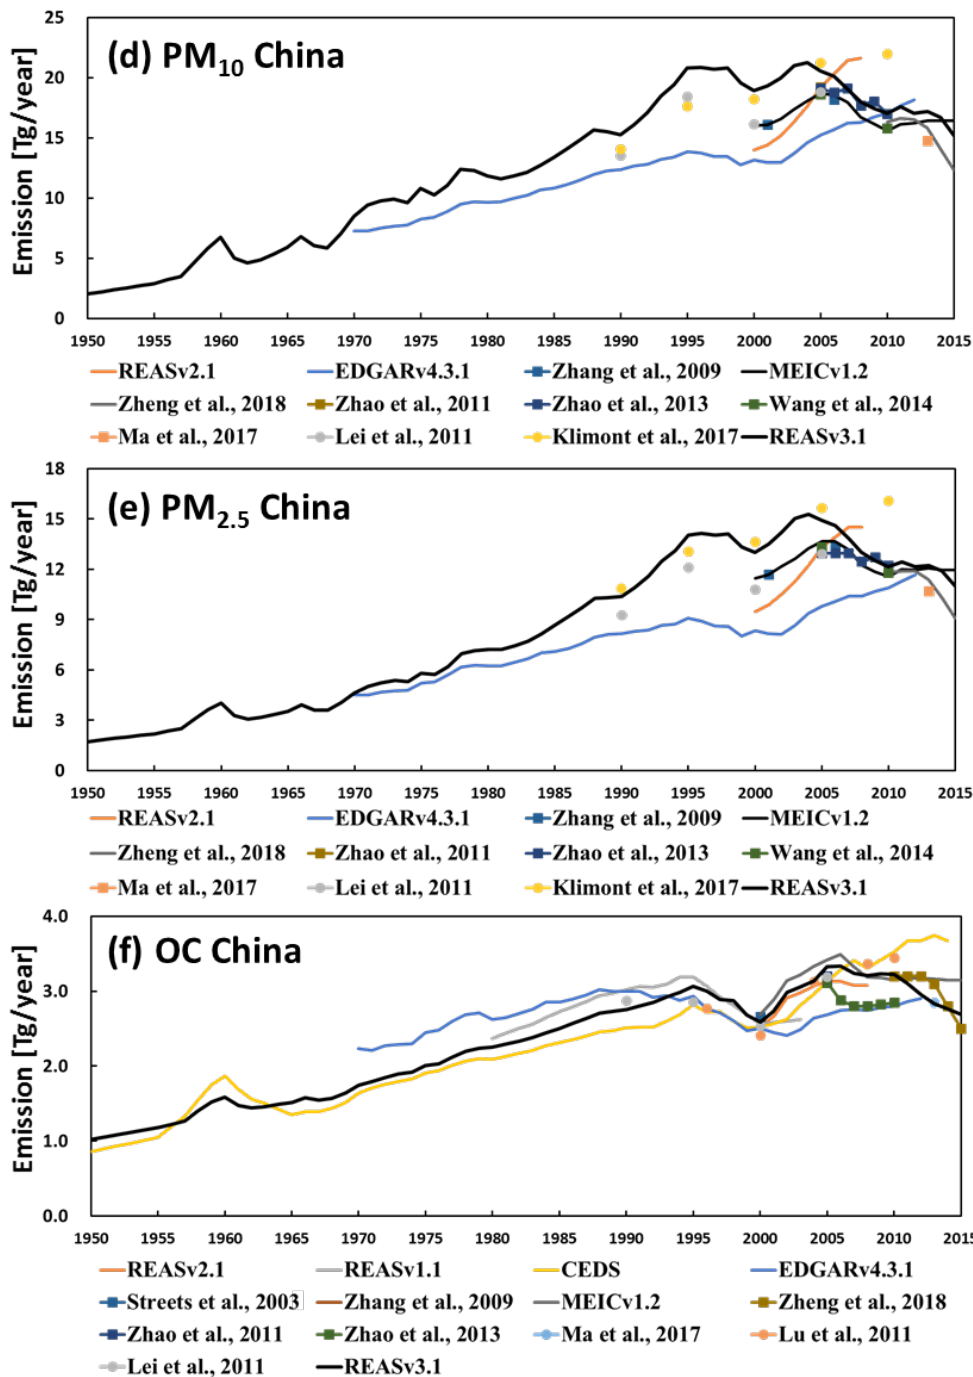

Figure S14: Continued.

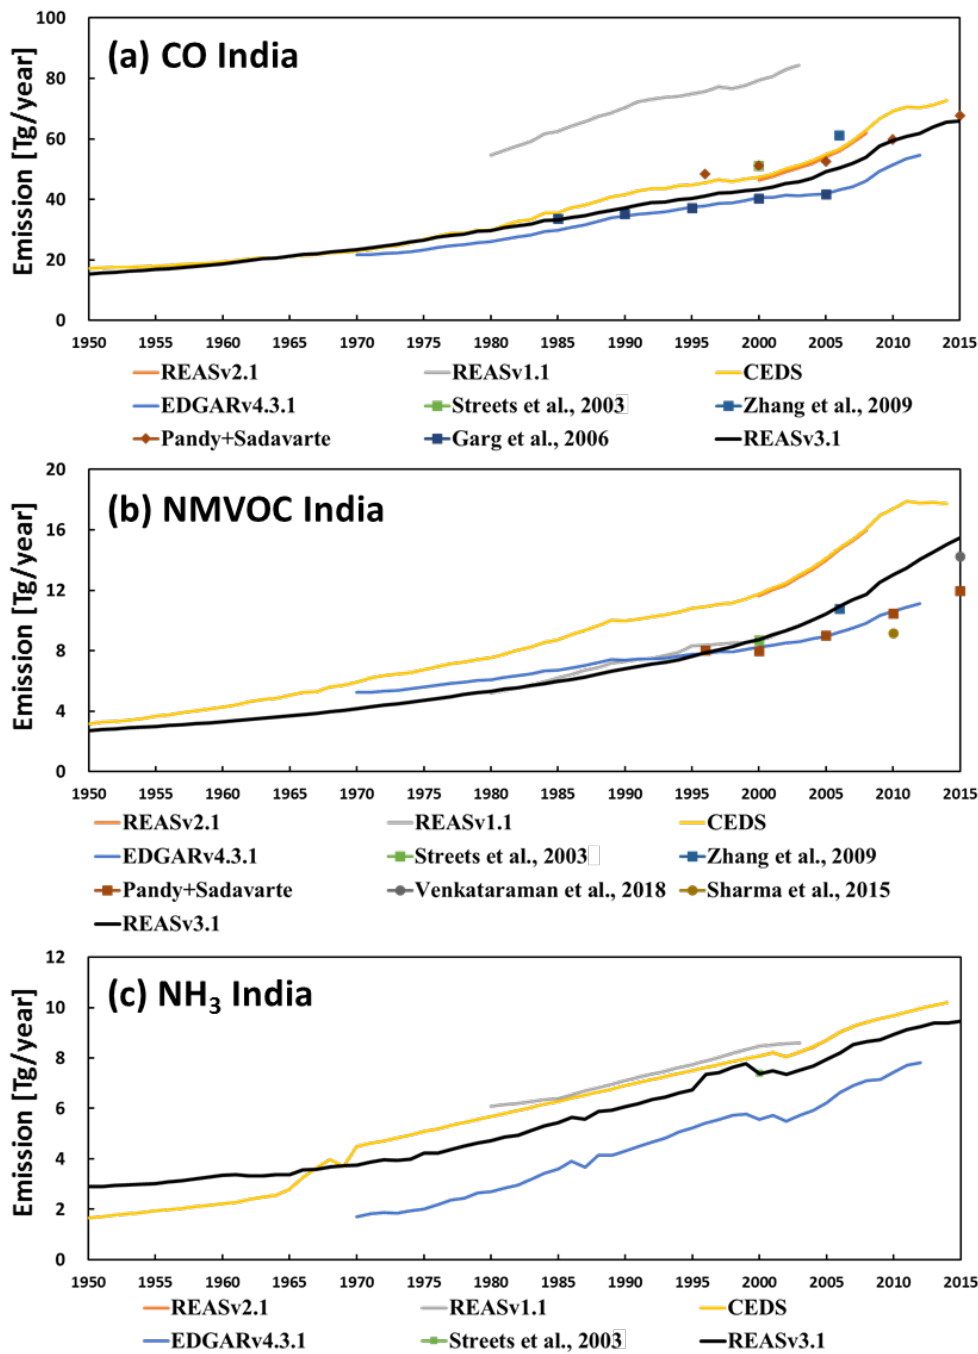

Figure S15: Comparison of (a) CO, (b) NMVOC, (c) NH<sub>3</sub>, (d) PM<sub>10</sub>, (e) PM<sub>2.5</sub> and (f) OC emissions in India between REASv3.1 and other studies.

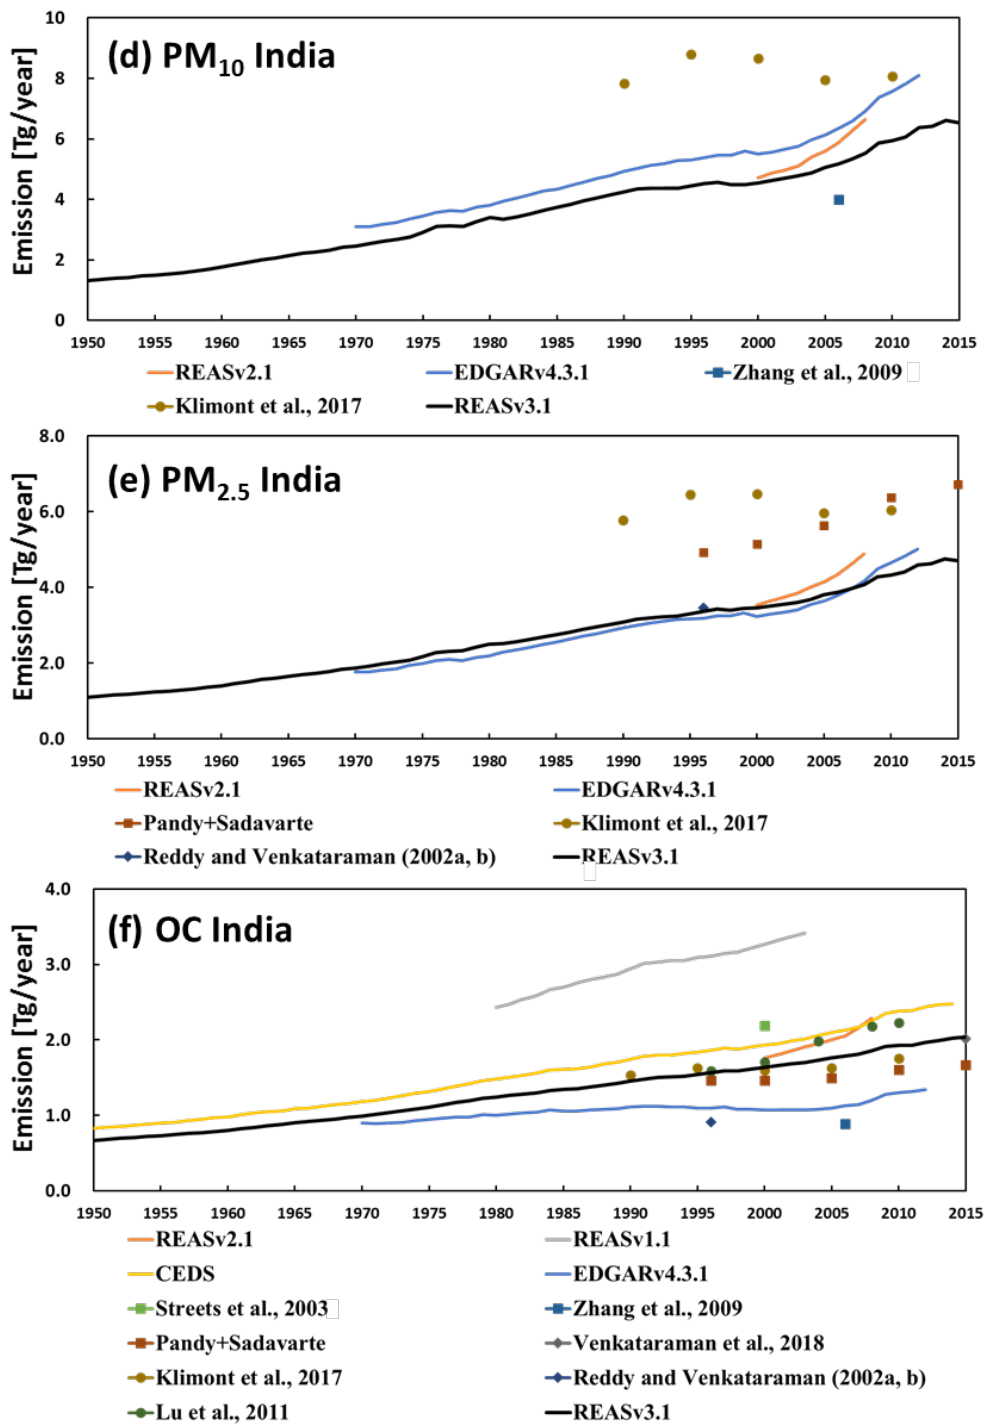

85

Figure S15: Continued.

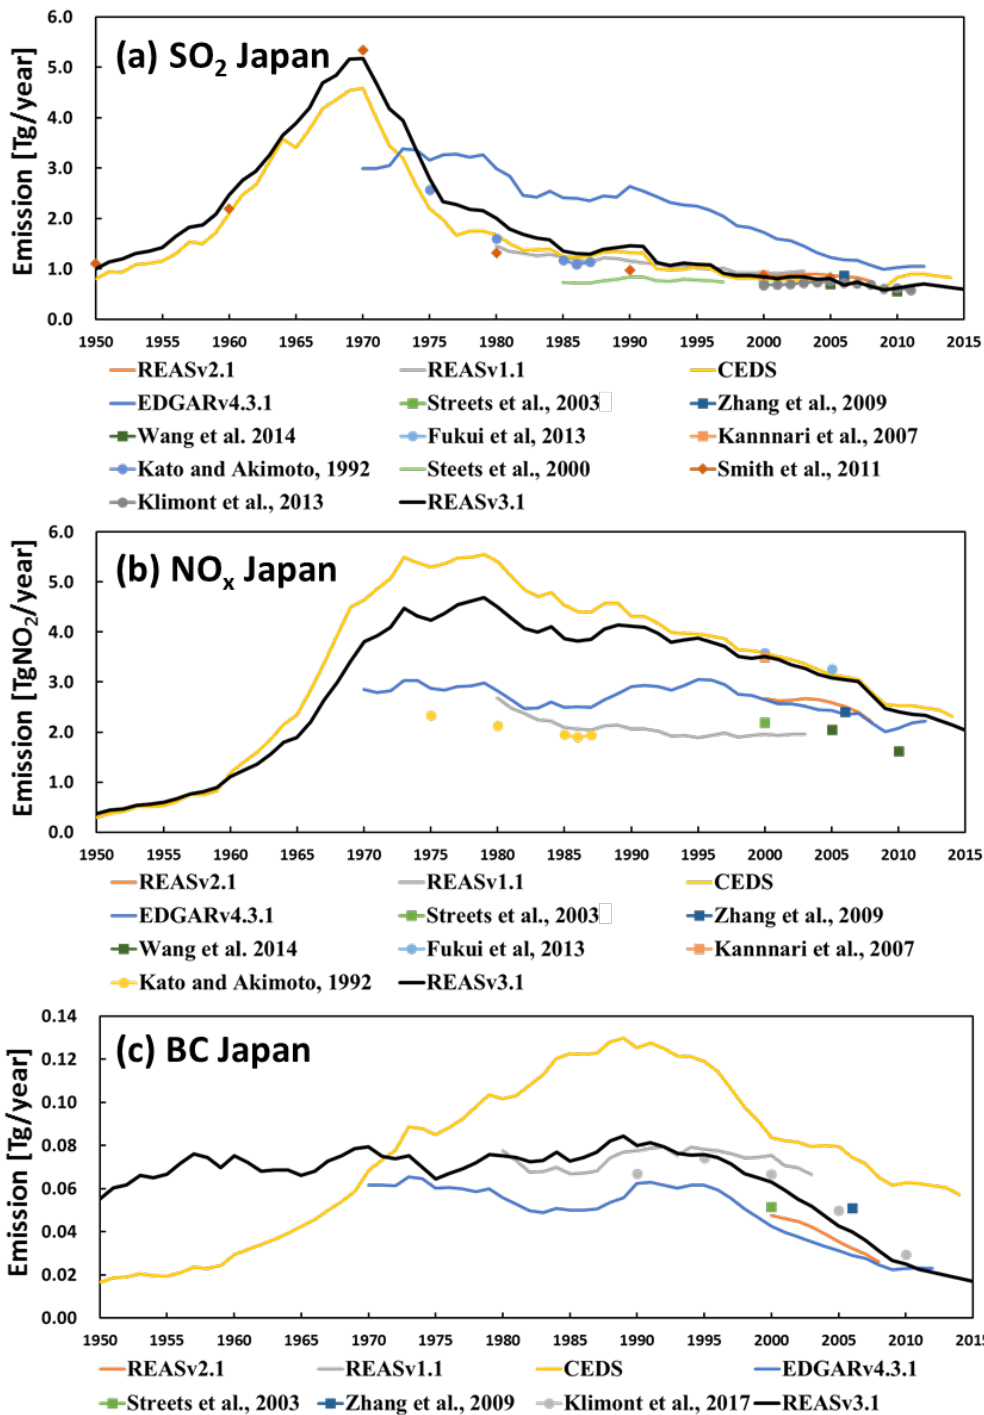

90 Figure S16: Comparison of (a) SO<sub>2</sub>, (b) NO<sub>x</sub>, (c) BC, (d) CO, (e) NMVOC, (f) NH<sub>3</sub>, (g) PM<sub>10</sub>, (h) PM<sub>2.5</sub> and (i) OC emissions in Japan between REASv3.1 and other studies.

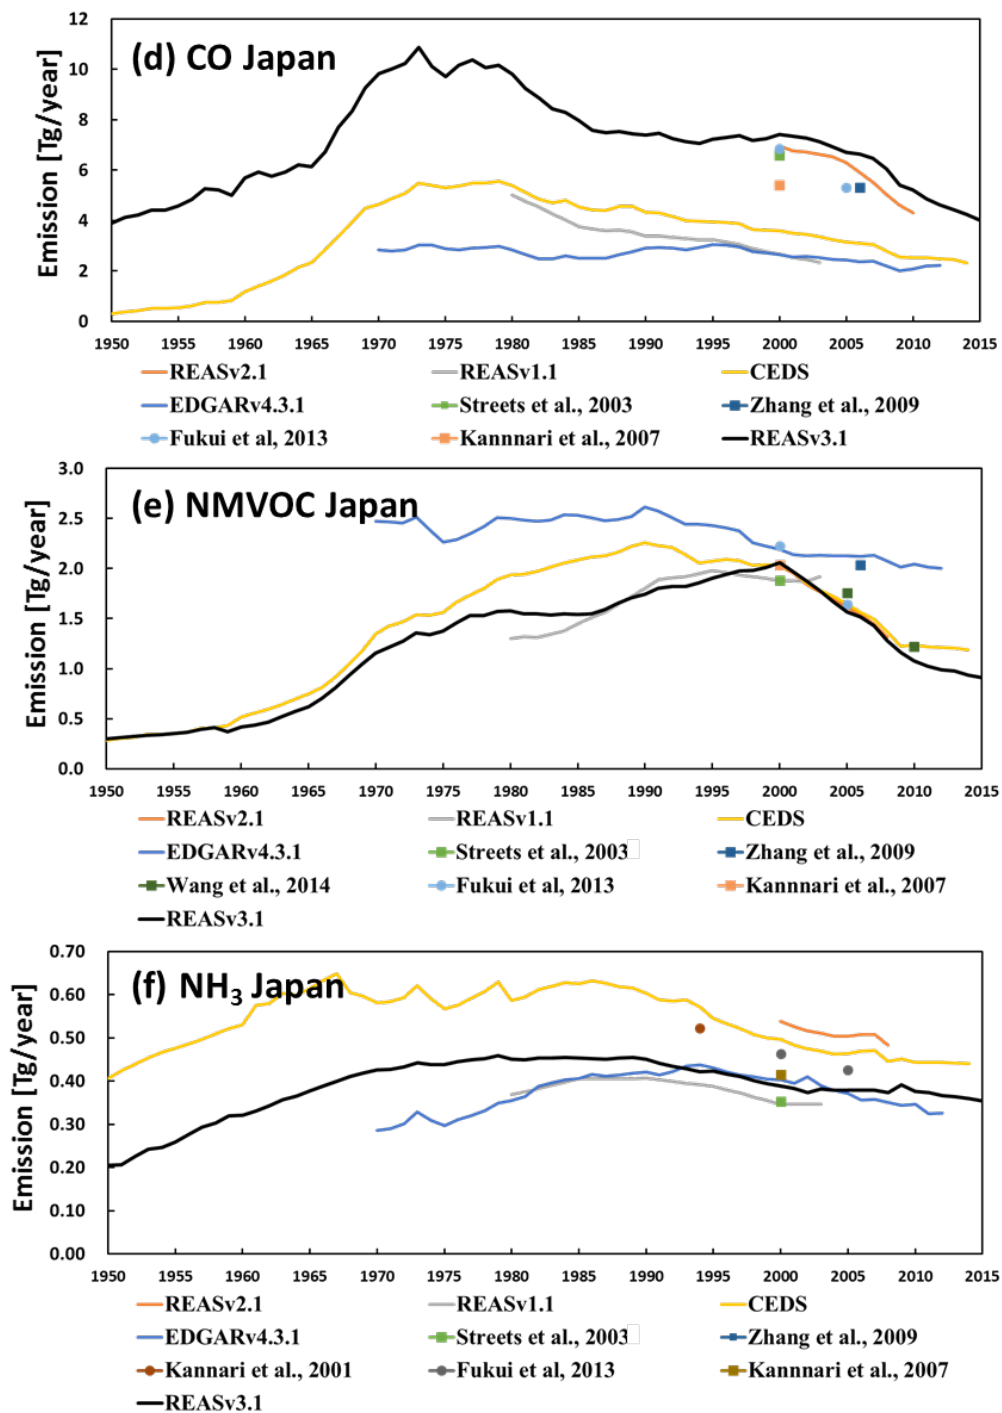

Figure S16: Continued.

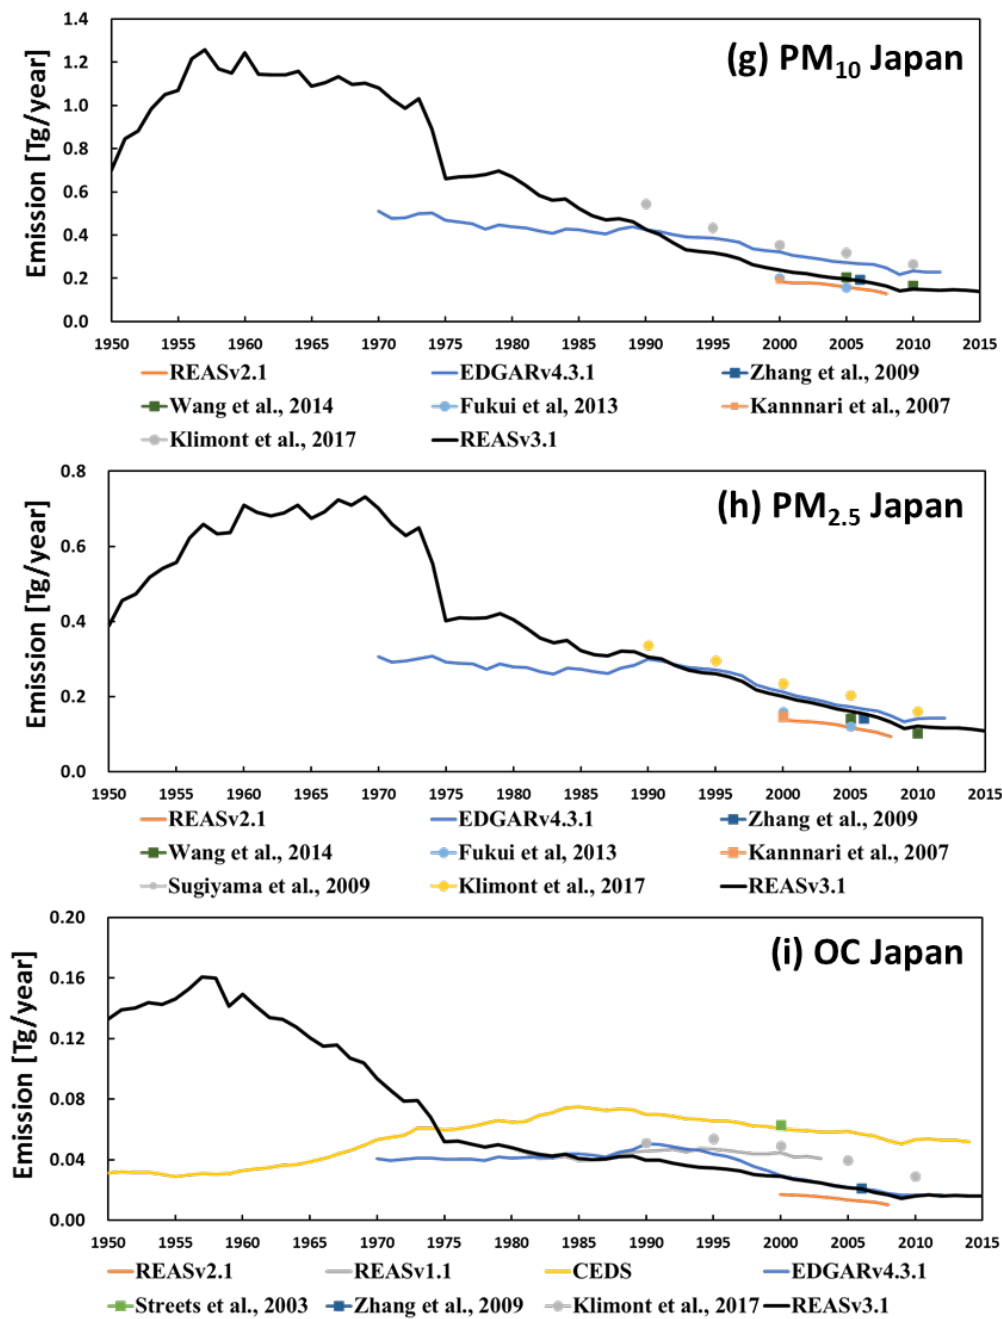

95 Figure S16: Continued.

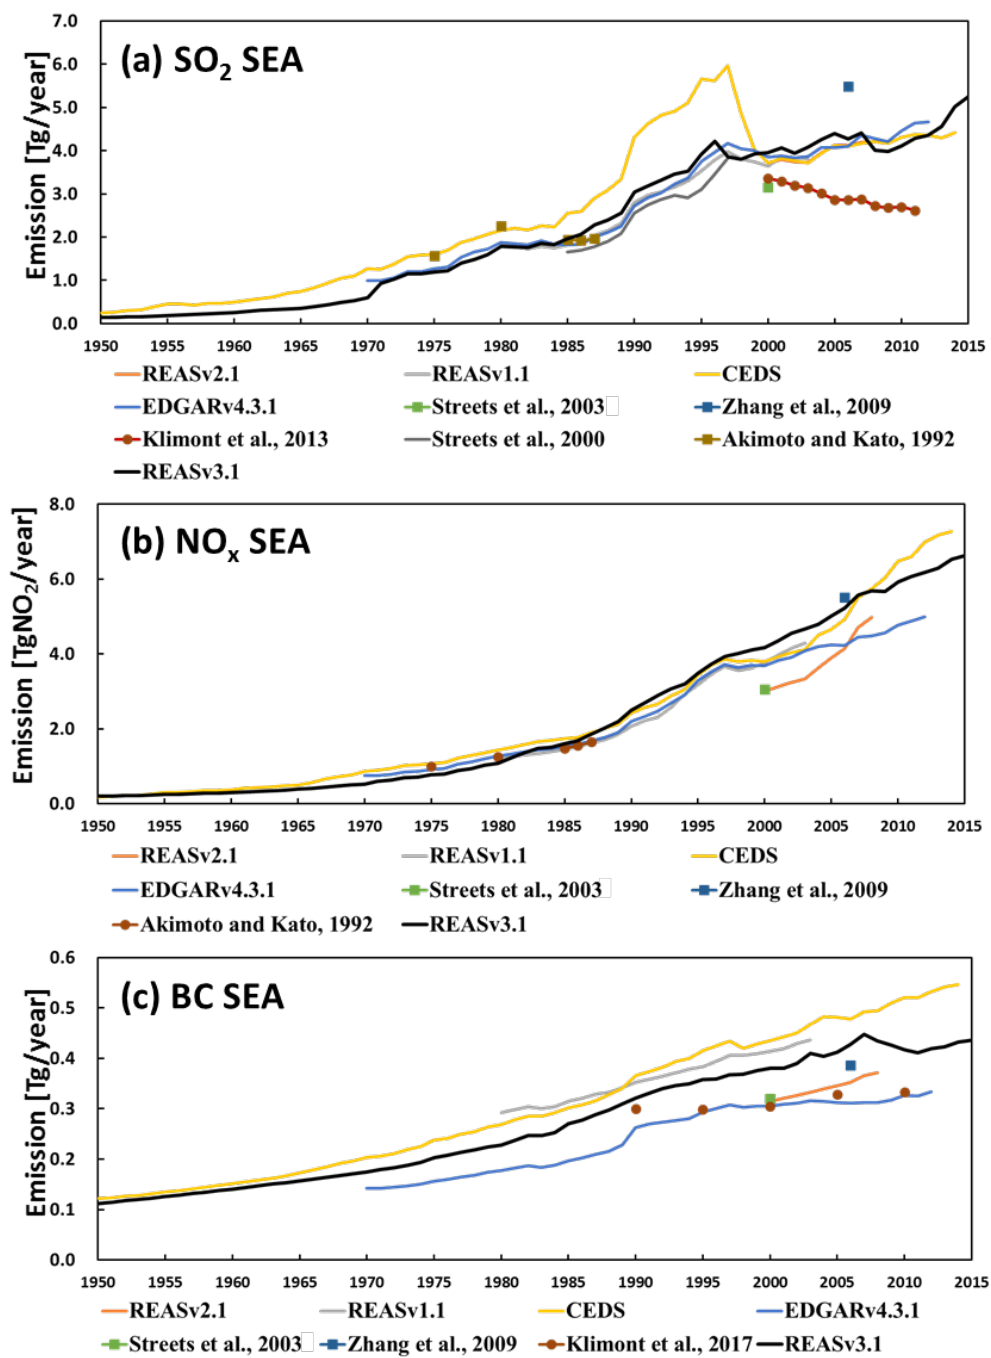

Figure S17: Comparison of (a) SO<sub>2</sub>, (b) NO<sub>x</sub>, (c) BC, (d) CO, (e) NMVOC, (f) NH<sub>3</sub>, (g) PM<sub>10</sub>, (h) PM<sub>2.5</sub> and (i) OC emissions in SEA between REASv3.1 and other studies.

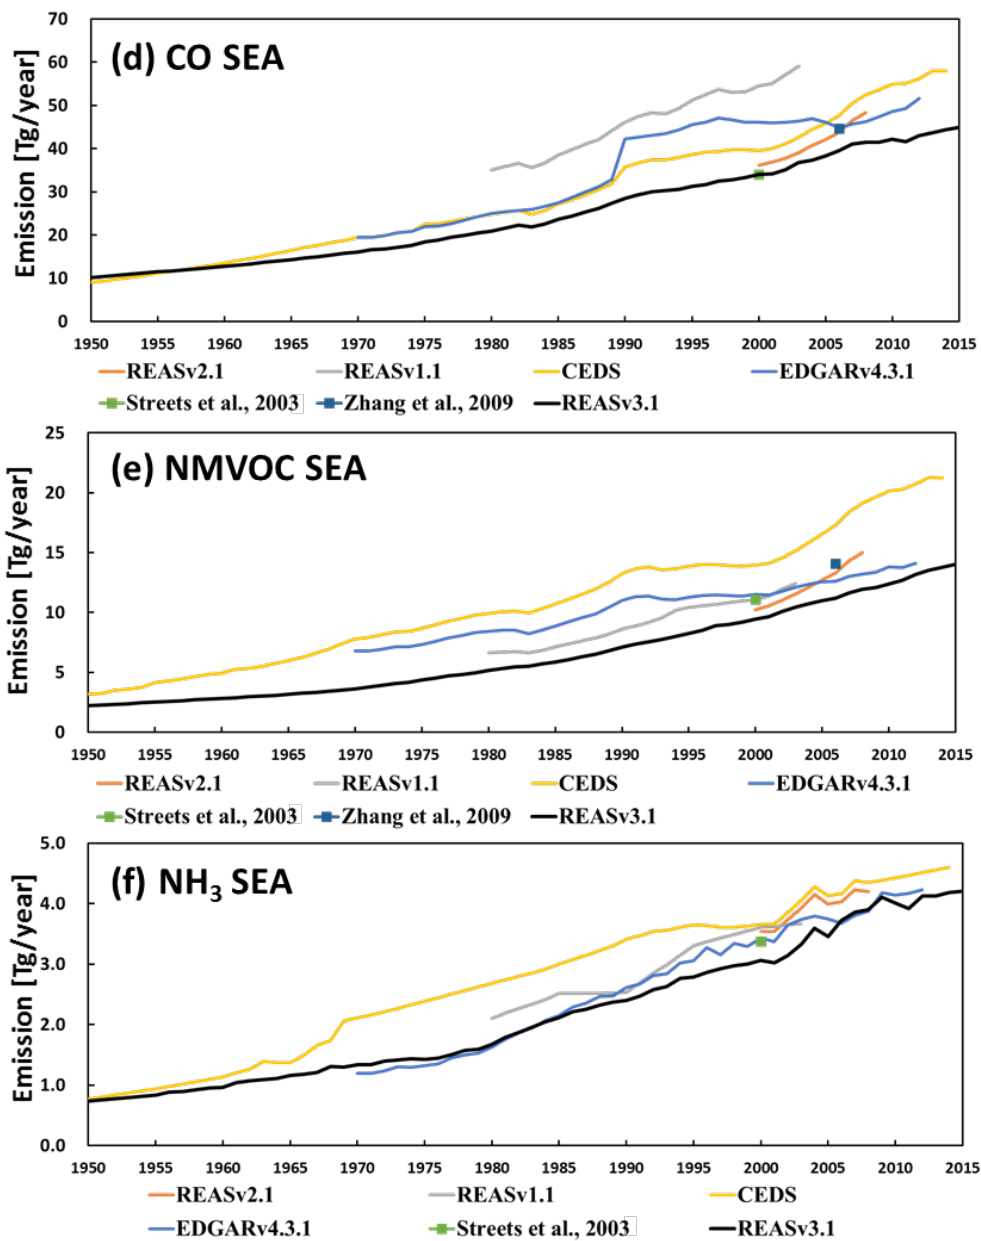

Figure S17: Continued.



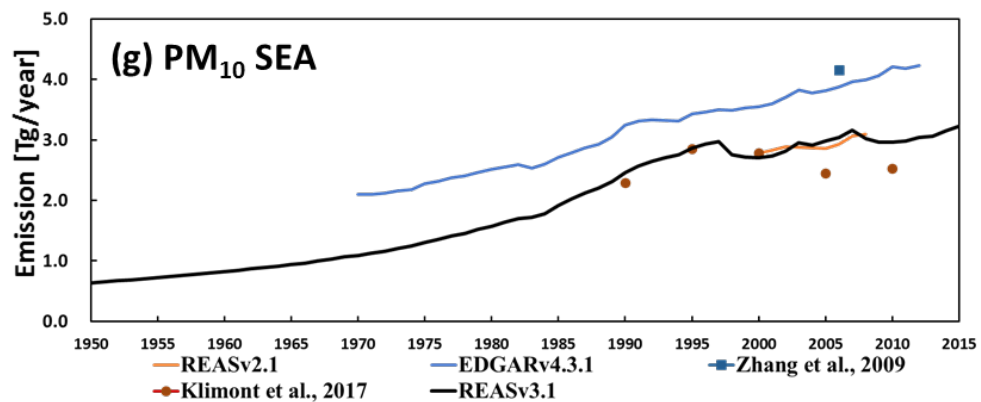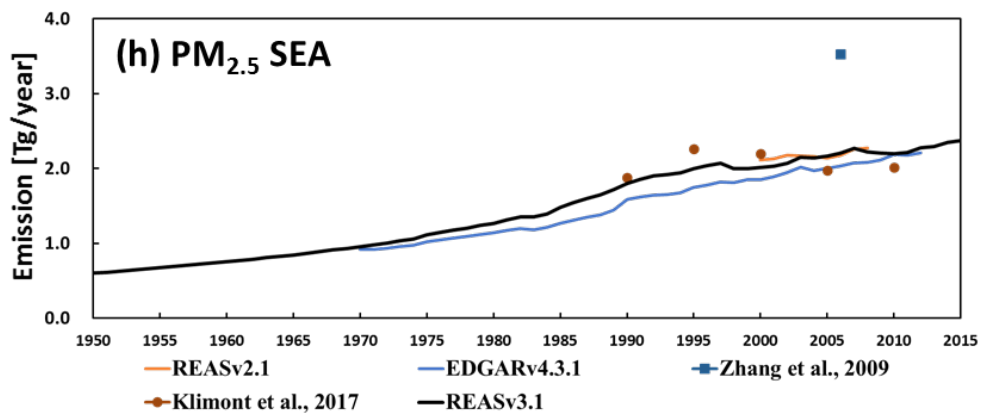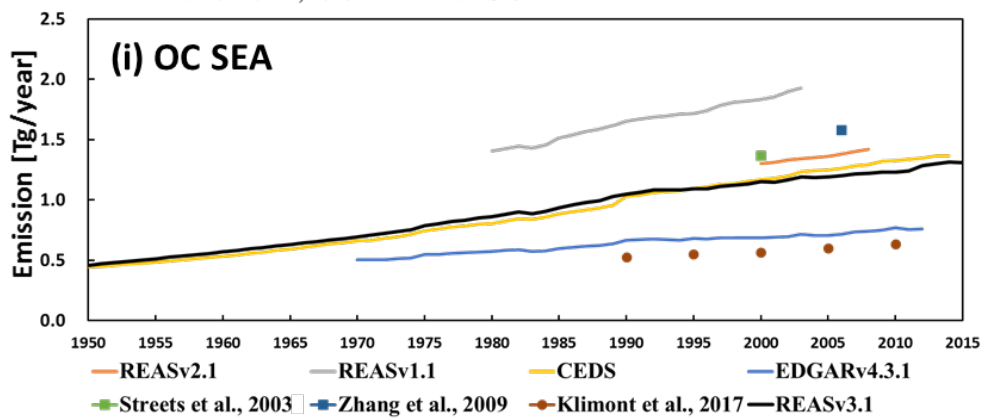

105

Figure S17: Continued.

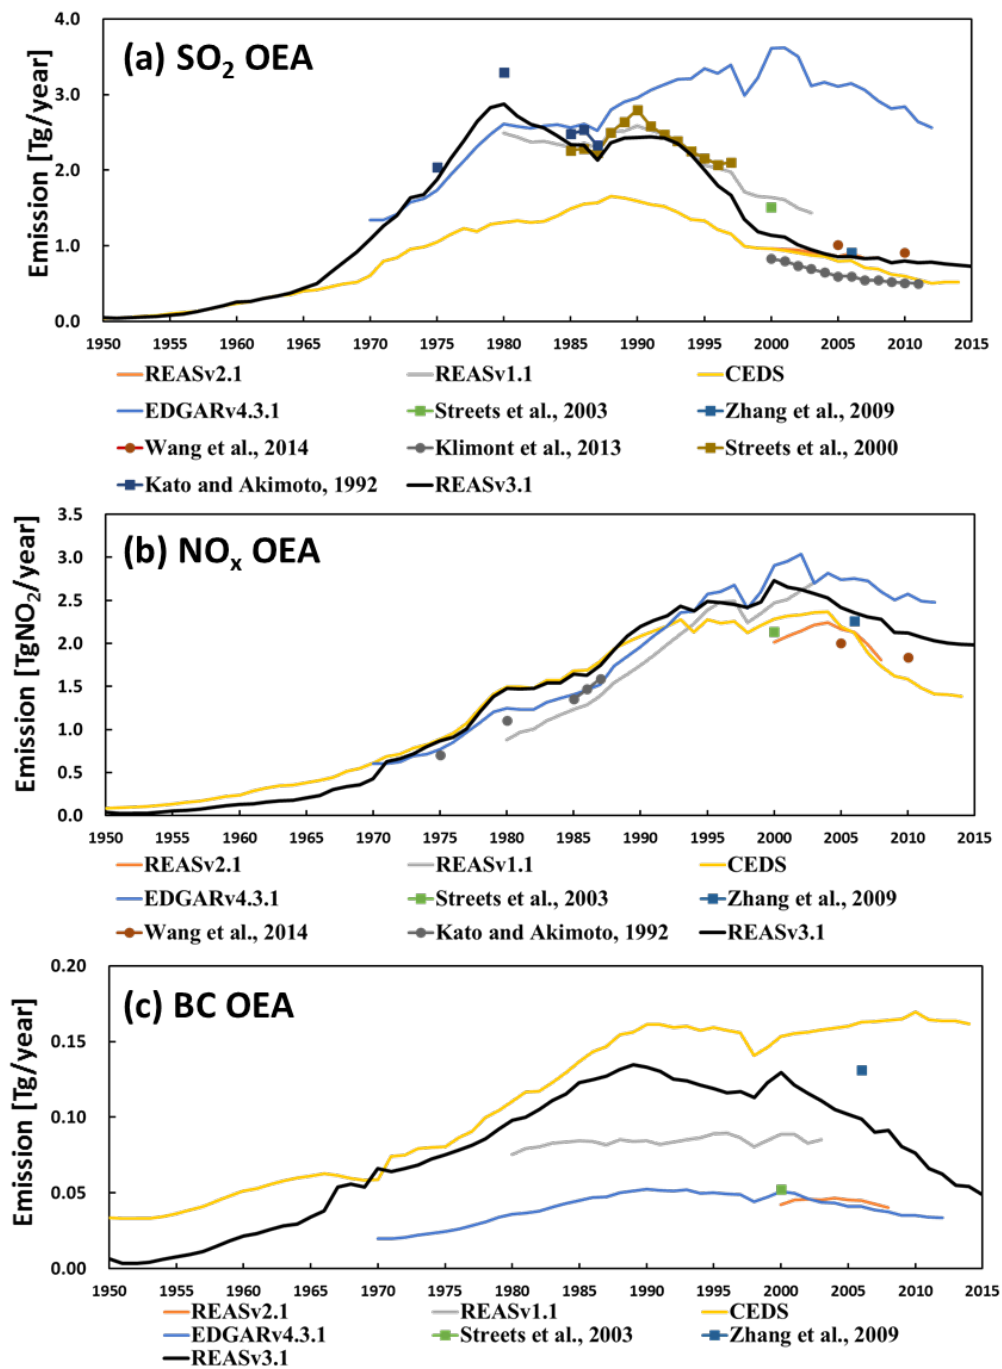

110 Figure S18: Comparison of (a) SO<sub>2</sub>, (b) NO<sub>x</sub>, (c) BC, (d) CO, (e) NMVOC, (f) NH<sub>3</sub>, (g) PM<sub>10</sub>, (h) PM<sub>2.5</sub> and (i) OC emissions in OEA between REASv3.1 and other studies.

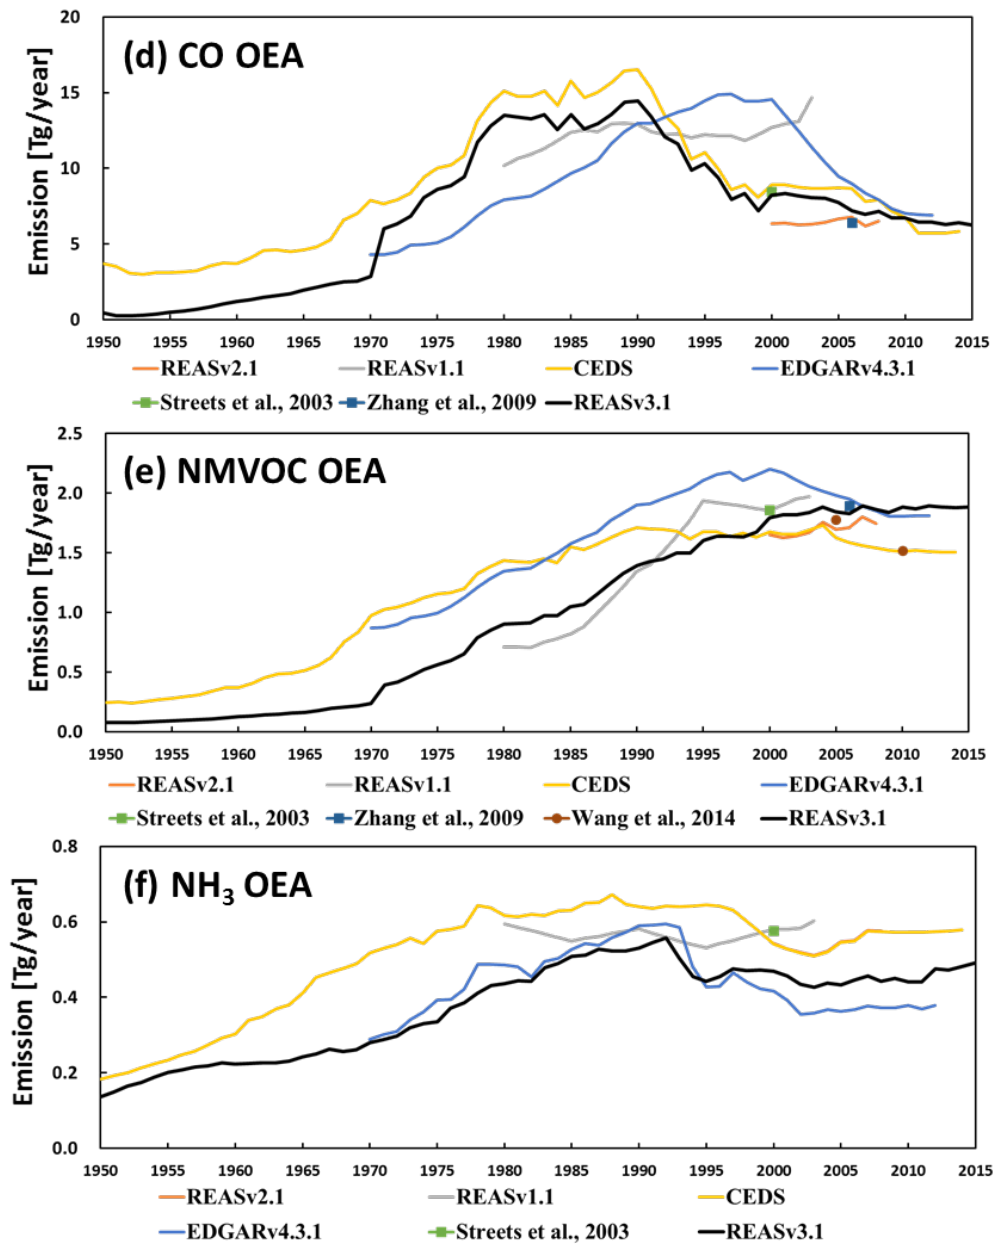

Figure S18: Continued.

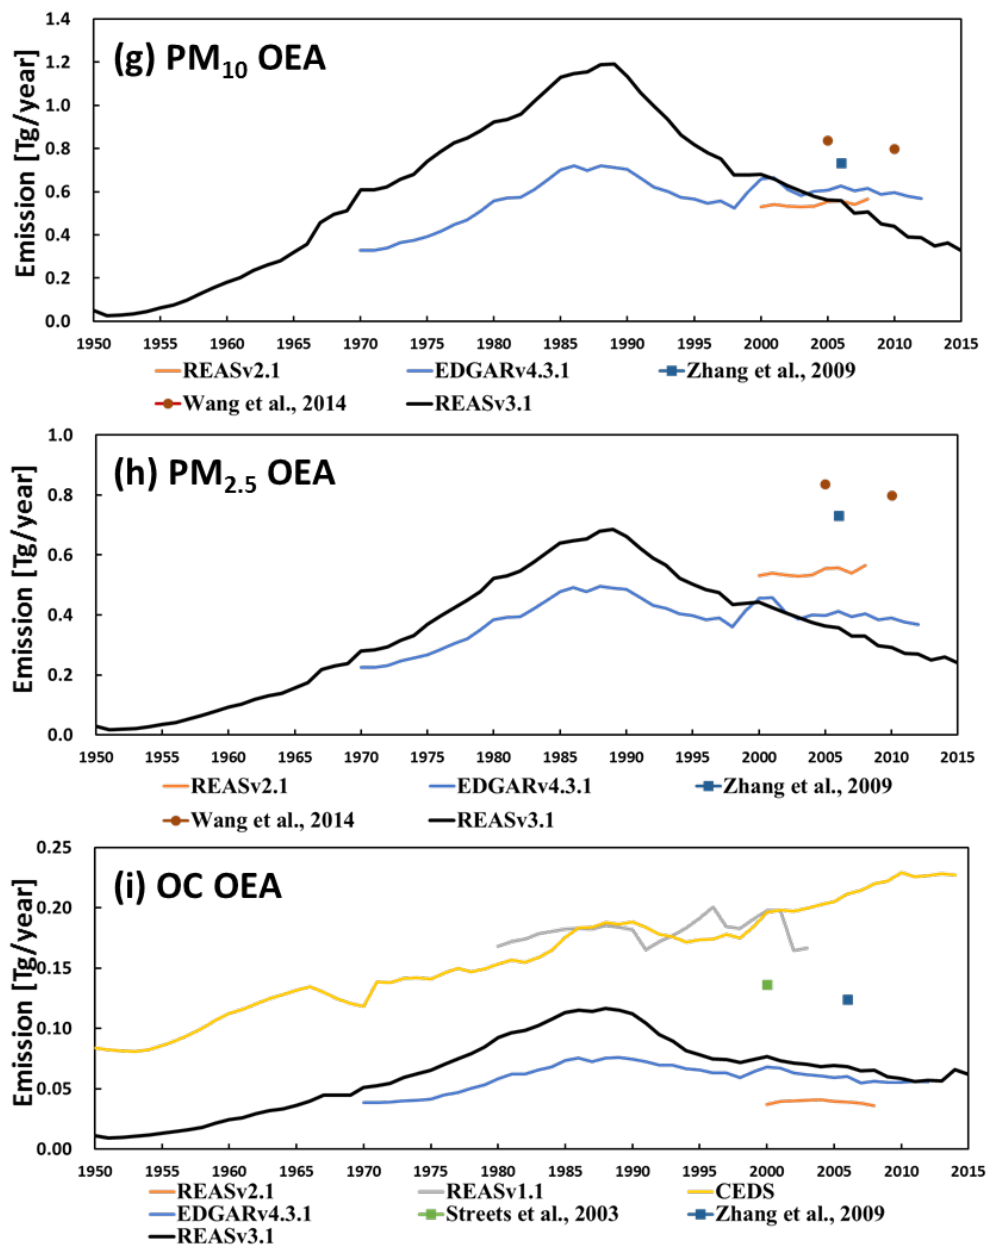

115

Figure S18: Continued.

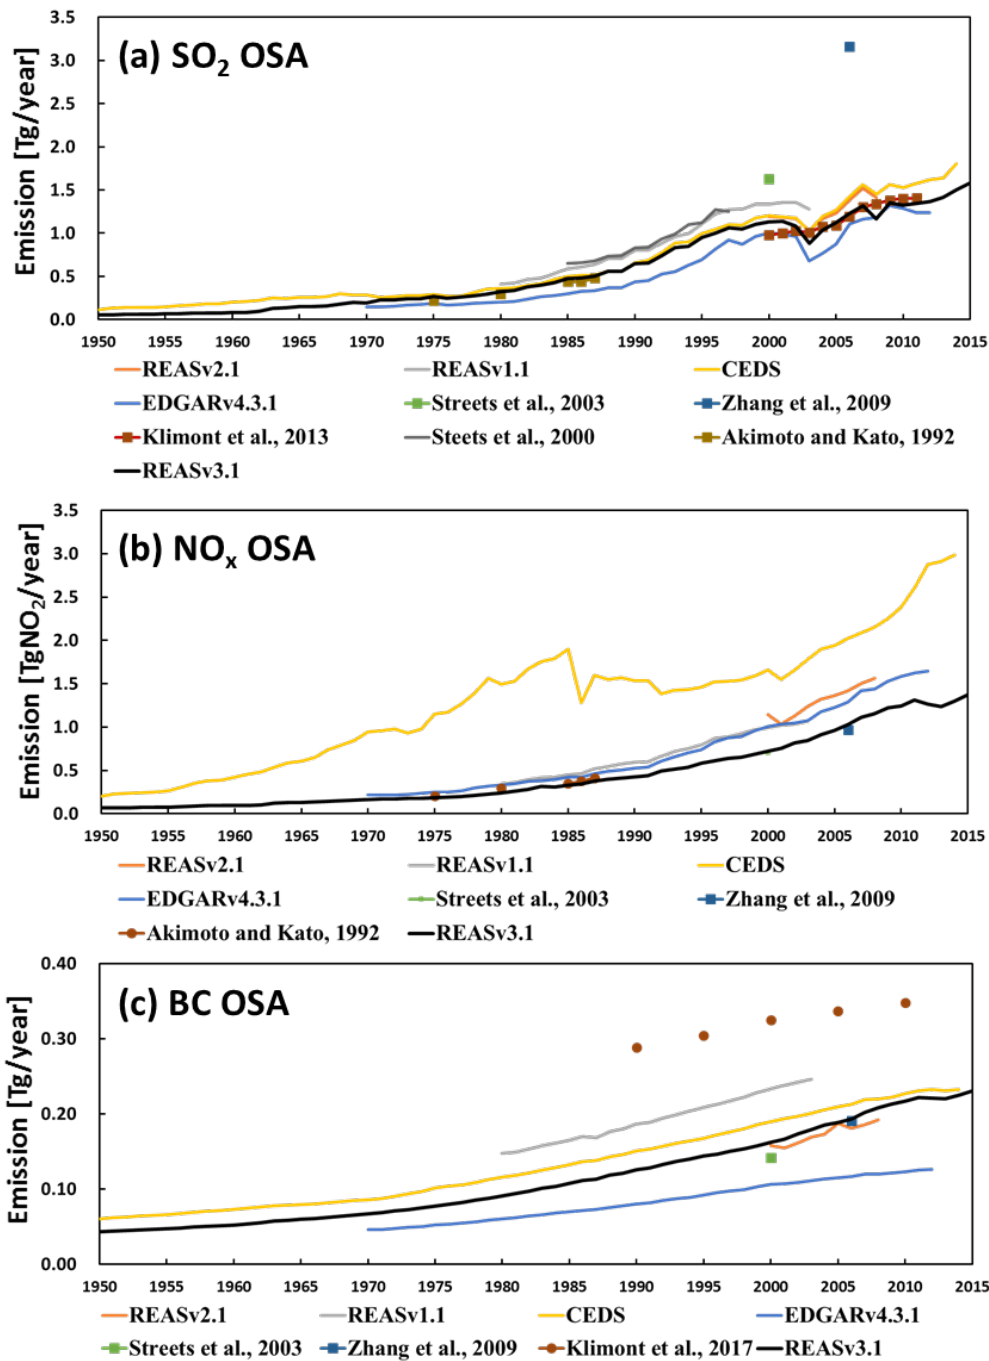

120 Figure S19: Comparison of (a) SO<sub>2</sub>, (b) NO<sub>x</sub>, (c) BC, (d) CO, (e) NMVOC, (f) NH<sub>3</sub>, (g) PM<sub>10</sub>, (h) PM<sub>2.5</sub> and (i) OC emissions in OSA between REASv3.1 and other studies.

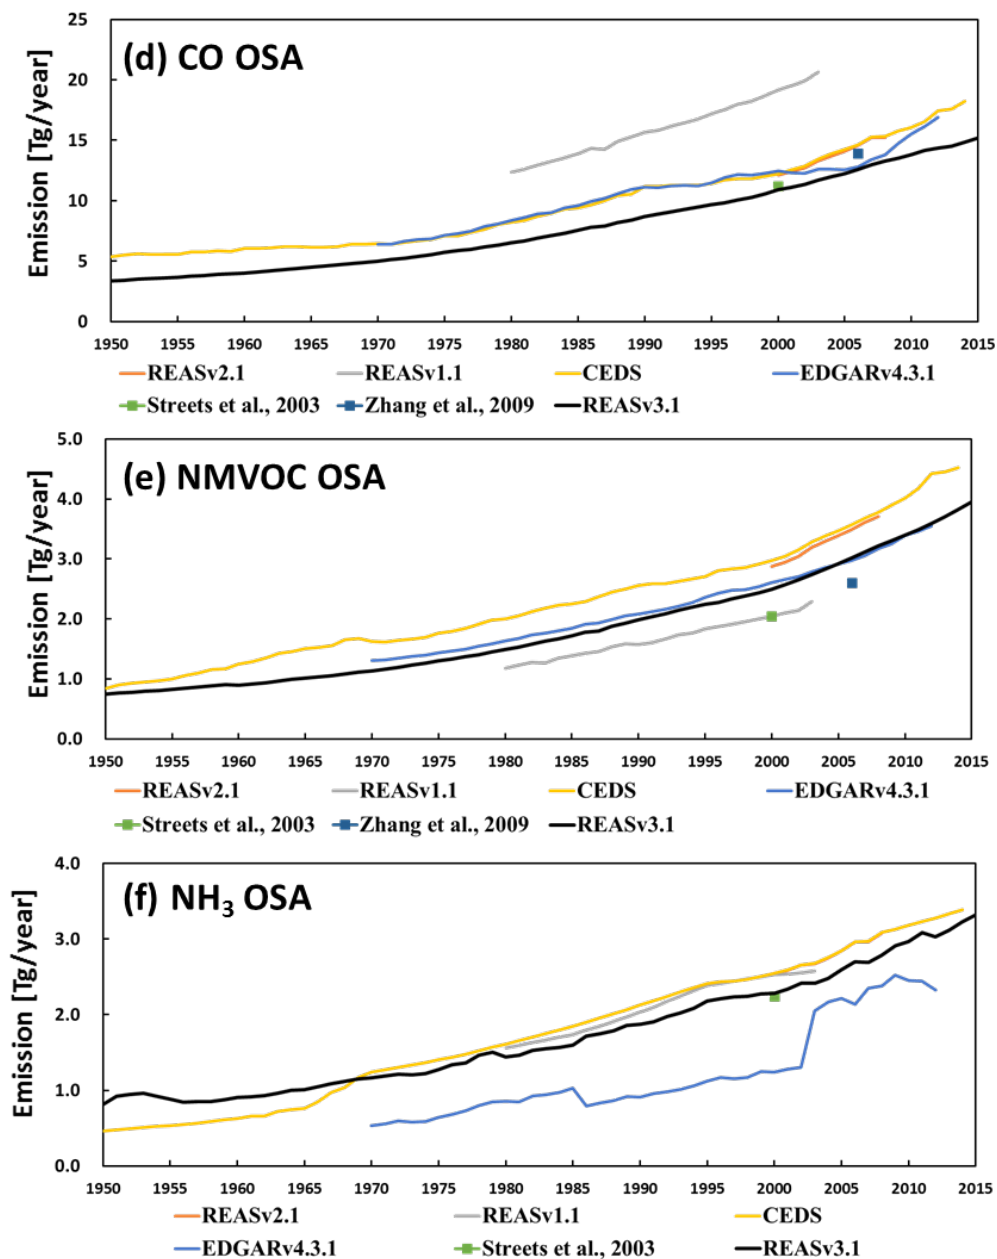

Figure S19: Continued.

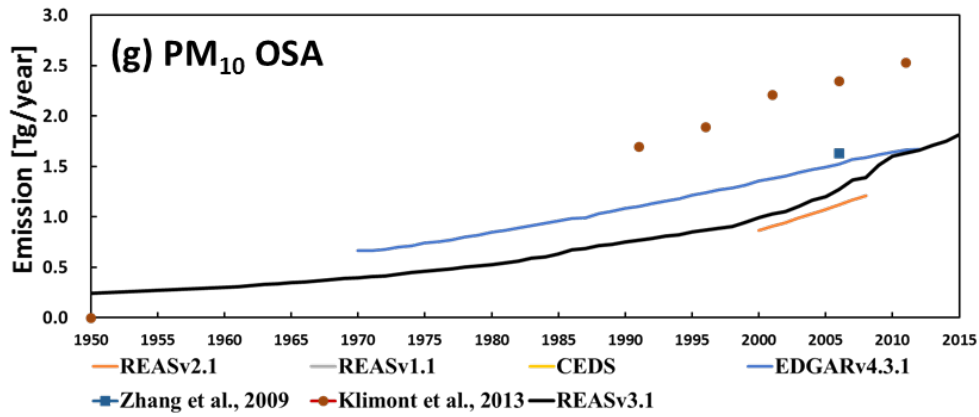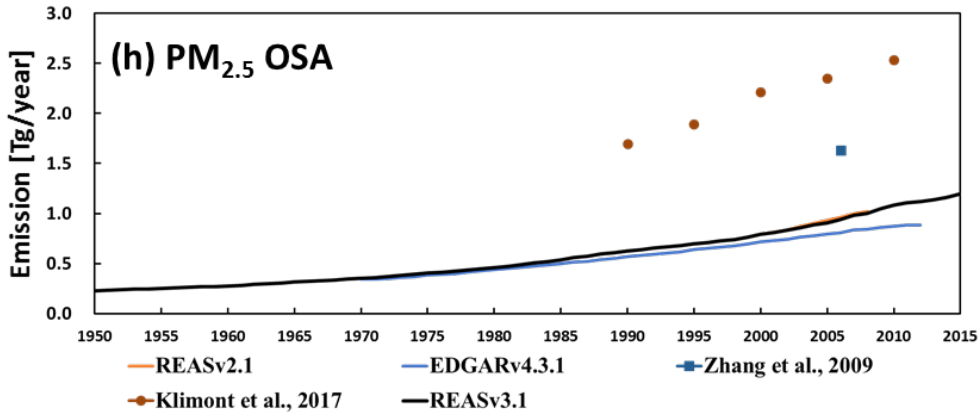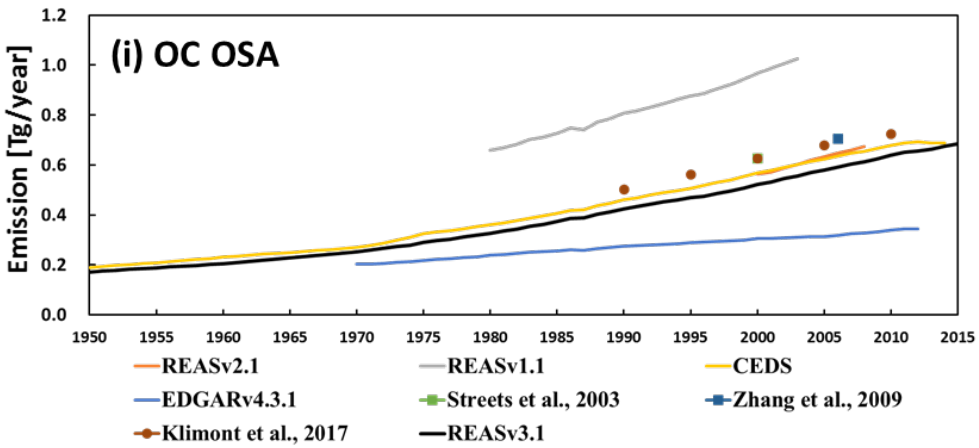

125

Figure S19: Continued.

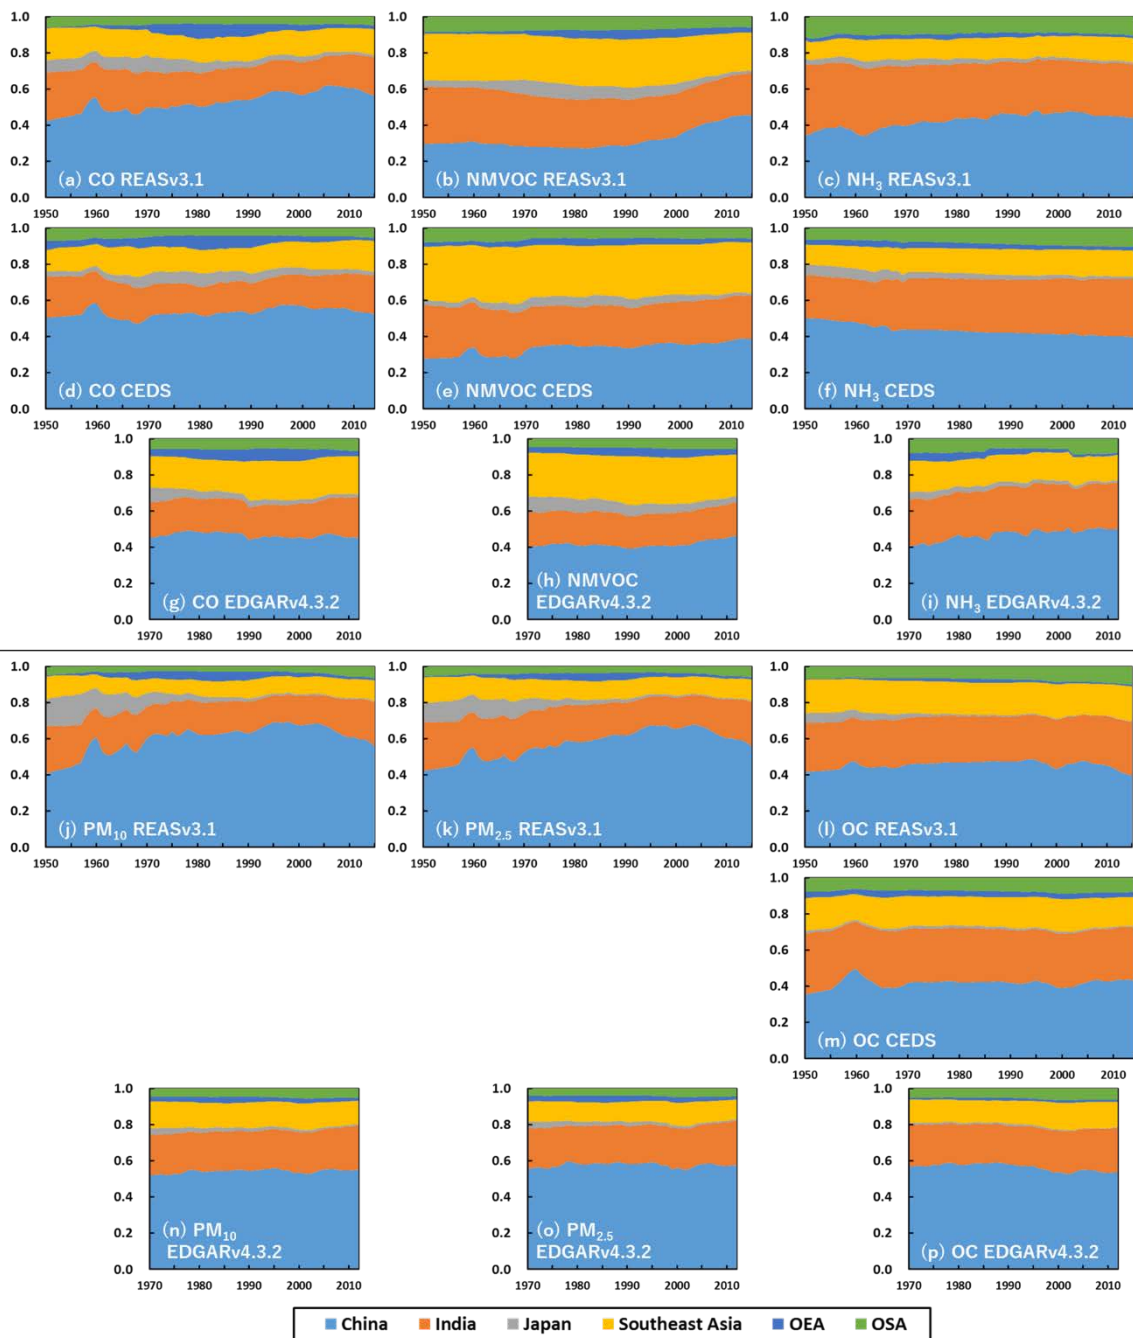

130 **Figure S20: Comparison of trends of relative ratios of emissions from China, India, Japan, Southeast Asia, OEA, and OSA for (a, d, g) CO, (b, e, h) NMVOC, (c, f, i) NH<sub>3</sub>, (j, n) PM<sub>10</sub>, (k, o) PM<sub>2.5</sub>, and (l, m, p) OC among (a, b, c, j, k, l) REASv3.1, (d, e, f, m) CEDS, and (g, h, i, n, o, p) EDGARv4.3.2.**



## Supplement Tables

135

**Table S1** provides target countries and sub-regions in REASv3.1 with their codes used in the manuscript and country and regional emission table data for major sectors and those for major fuel types available from a data download site of REAS (<http://www.nies.go.jp/REAS/>).

**Table S2** shows uncertainties of emissions of SO<sub>2</sub>, NO<sub>x</sub>, CO, CO<sub>2</sub>, PM<sub>10</sub>, PM<sub>2.5</sub>, BC, and OC for each sector in China, India, 140 Japan, Southeast Asia (SEA), East Asia other than China and Japan (OEA), and South Asia other than India (OSA) in 2015, 1985, and 1955.

**Table S3** presents uncertainties of emissions of NMVOC for each sector in China, India, Japan, SEA, OEA, and OSA in 2015, 1985, and 1955.

**Table S4** provides uncertainties of emissions of NH<sub>3</sub> for each sector in China, India, Japan, SEA, OEA, and OSA in 145 2015, 1985, and 1955.

**Table S1: Countries and sub-regions included in REAS 3.1.**

| Region          | Country/Sub-region                                                                                  | Code  |
|-----------------|-----------------------------------------------------------------------------------------------------|-------|
| China (CHN)     | China/Whole Country                                                                                 | CHNWC |
|                 | China/Beijing                                                                                       | CHNBJ |
|                 | China/Tianjin                                                                                       | CHNTJ |
|                 | China/Hebei                                                                                         | CHNHE |
|                 | China/Shanxi                                                                                        | CHNSX |
|                 | China/Inner Mongolia                                                                                | CHNNM |
|                 | China/Liaoning                                                                                      | CHNLN |
|                 | China/Jilin                                                                                         | CHNJL |
|                 | China/Heilongjiang                                                                                  | CHNHL |
|                 | China/Shanghai                                                                                      | CHNSH |
|                 | China/Jiangsu                                                                                       | CHNJS |
|                 | China/Zhejiang                                                                                      | CHNZJ |
|                 | China/Anhui                                                                                         | CHNAH |
|                 | China/Fujian                                                                                        | CHNFJ |
|                 | China/Jiangxi                                                                                       | CHNJX |
|                 | China/Shandong                                                                                      | CHNSD |
|                 | China/Henan                                                                                         | CHNHA |
|                 | China/Hubei                                                                                         | CHNHB |
|                 | China/Hunan                                                                                         | CHNHN |
|                 | China/Guangdong                                                                                     | CHNGD |
|                 | China/Guangxi                                                                                       | CHNGX |
|                 | China/Hainan                                                                                        | CHNHI |
|                 | China/Chongqing                                                                                     | CHNCQ |
|                 | China/Sichuan                                                                                       | CHNSC |
|                 | China/Guizhou                                                                                       | CHNGZ |
|                 | China/Yunnan                                                                                        | CHNYN |
|                 | China/Tibet                                                                                         | CHNXZ |
|                 | China/Shaanxi                                                                                       | CHNSN |
|                 | China/Gansu                                                                                         | CHNGS |
|                 | China/Qinghai                                                                                       | CHNQH |
| China/Ningxia   | CHNNX                                                                                               |       |
| China/Xinjiang  | CHNXJ                                                                                               |       |
| China/Hong Kong | CHNHK                                                                                               |       |
| China/Macau     | CHNMC                                                                                               |       |
| India (IND)     | India/Whole Country                                                                                 | INDWC |
|                 | India/Andhra Pradesh                                                                                | INDAP |
|                 | India/Bihar, Jharkhand                                                                              | INDBJ |
|                 | India/North East (Arunachal Pradesh, Assam, Manipur, Meghalaya, Mizoram, Nagaland, Sikkim, Tripura) | INDAN |
|                 | India/Gujarat                                                                                       | INDGU |
|                 | India/Haryana                                                                                       | INDHA |
|                 | India/Karnataka, Goa                                                                                | INDKG |
|                 | India/Kerala                                                                                        | INDKE |
|                 | India/Madhya Pradesh, Chhattisgarh                                                                  | INDMC |
|                 | India/Maharashtra                                                                                   | INDMA |

|                        |                                           |       |
|------------------------|-------------------------------------------|-------|
|                        | India/Orissa                              | INDOR |
|                        | India/Punjab, Chandigarh                  | INDPU |
|                        | India/Rajasthan                           | INDRA |
|                        | India/Tamil Nadu                          | INDTN |
|                        | India/Utter Pradesh, Uttarachal           | INDUU |
|                        | India/West Bengal                         | INDWB |
|                        | India/Himachal Pradesh, Jammu and Kashmir | INDHJ |
|                        | India/Delhi                               | INDDE |
| Japan (JPN)            | Japan/Whole Country                       | JPNWC |
|                        | Japan/Hokkaido-Tohoku                     | JPNHT |
|                        | Japan/Kanto                               | JPNKN |
|                        | Japan/Chubu                               | JPNCB |
|                        | Japan/Kinki                               | JPNKK |
|                        | Japan/Chugoku-Shikoku                     | JPNCS |
|                        | Japan/Kyushu-Okinawa                      | JPNKO |
| Other East Asia (OEA)  | Korea, Rep of/Whole Country               | KORWC |
|                        | Korea, DPR/Whole Country                  | PRKWC |
|                        | Mongolia/Whole Country                    | MNGWC |
|                        | Taiwan/Whole Country                      | TWNWC |
| Southeast Asia (SEA)   | Brunei/Whole Country                      | BRNWC |
|                        | Cambodia/Whole Country                    | KHMWC |
|                        | Indonesia/Whole Country                   | IDNWC |
|                        | Laos/Whole Country                        | LAOWC |
|                        | Malaysia/Whole Country                    | MYSWC |
|                        | Myanmar/Whole Country                     | MMRWC |
|                        | Philippines/Whole Country                 | PHLWC |
|                        | Singapore/Whole Country re                | SGPWC |
|                        | Thailand/Whole Country                    | THAWC |
|                        | Vietnam/Whole Country                     | VNMWC |
| Other South Asia (OSA) | Bangladesh/Whole Country                  | BGDWC |
|                        | Bhutan/Whole Country                      | BTNWC |
|                        | Nepal/Whole Country                       | NPLWC |
|                        | Pakistan/Whole Country                    | PAKWC |
|                        | Sri Lanka/Whole Country                   | LKAWC |
|                        | Afghanistan/Whole Country                 | AFGWC |
|                        | Maldives/Whole Country                    | MDVWC |

150 Table S2: Uncertainties [%] of emissions of SO<sub>2</sub>, NO<sub>x</sub>, CO, CO<sub>2</sub>, PM<sub>10</sub>, PM<sub>2.5</sub>, BC, and OC for each sector in China, India, Japan, Southeast Asia (SEA), East Asia other than China and Japan (OEA), and South Asia other than India (OSA) in (a) 2015, (b) 1985, and (c) 1955. Abbreviations for sectors are as follows: PP = Power Plants, IND = Industry, ROAD = Road transport, OTRA = Other transport, and DOM = Domestic. For OTRA of OEA in 1955, no emissions were estimated.

(a) 2015

|       | SO <sub>2</sub> | NO <sub>x</sub> | CO   | CO <sub>2</sub> | PM <sub>10</sub> | PM <sub>2.5</sub> | BC   | OC   |
|-------|-----------------|-----------------|------|-----------------|------------------|-------------------|------|------|
| China |                 |                 |      |                 |                  |                   |      |      |
| PP    | ±38             | ±65             | ±78  | ±48             | ±83              | ±83               | ±83  | ±83  |
| IND   | ±48             | ±70             | ±113 | ±40             | ±115             | ±116              | ±160 | ±153 |
| ROAD  | ±43             | ±47             | ±71  | ±46             | ±87              | ±86               | ±90  | ±83  |
| OTRA  | ±57             | ±79             | ±131 | ±59             | ±134             | ±125              | ±138 | ±134 |
| DOM   | ±59             | ±118            | ±205 | ±88             | ±251             | ±264              | ±258 | ±302 |
| India |                 |                 |      |                 |                  |                   |      |      |
| PP    | ±47             | ±69             | ±102 | ±46             | ±96              | ±95               | ±93  | ±167 |
| IND   | ±54             | ±74             | ±136 | ±55             | ±162             | ±181              | ±173 | ±243 |
| ROAD  | ±52             | ±58             | ±67  | ±42             | ±88              | ±88               | ±95  | ±82  |
| OTRA  | ±70             | ±84             | ±121 | ±66             | ±112             | ±112              | ±112 | ±112 |
| DOM   | ±81             | ±174            | ±236 | ±136            | ±287             | ±292              | ±291 | ±298 |
| Japan |                 |                 |      |                 |                  |                   |      |      |
| PP    | ±36             | ±43             | ±89  | ±41             | ±87              | ±89               | ±90  | ±93  |
| IND   | ±43             | ±59             | ±64  | ±39             | ±96              | ±99               | ±89  | ±108 |
| ROAD  | ±24             | ±17             | ±38  | ±31             | ±50              | ±50               | ±51  | ±50  |
| OTRA  | ±39             | ±80             | ±117 | ±58             | ±110             | ±111              | ±111 | ±111 |
| DOM   | ±51             | ±62             | ±78  | ±39             | ±74              | ±75               | ±72  | ±75  |
| SEA   |                 |                 |      |                 |                  |                   |      |      |
| PP    | ±59             | ±67             | ±113 | ±46             | ±102             | ±103              | ±103 | ±141 |
| IND   | ±55             | ±78             | ±195 | ±62             | ±165             | ±191              | ±181 | ±254 |
| ROAD  | ±54             | ±65             | ±109 | ±46             | ±92              | ±91               | ±89  | ±97  |
| OTRA  | ±69             | ±83             | ±121 | ±65             | ±112             | ±112              | ±112 | ±112 |
| DOM   | ±95             | ±173            | ±219 | ±137            | ±286             | ±288              | ±289 | ±291 |
| OEA   |                 |                 |      |                 |                  |                   |      |      |
| PP    | ±54             | ±63             | ±84  | ±43             | ±96              | ±96               | ±92  | ±83  |
| IND   | ±60             | ±79             | ±110 | ±56             | ±116             | ±115              | ±111 | ±120 |
| ROAD  | ±98             | ±106            | ±111 | ±73             | ±133             | ±134              | ±137 | ±130 |
| OTRA  | ±58             | ±89             | ±126 | ±71             | ±117             | ±117              | ±117 | ±117 |
| DOM   | ±75             | ±108            | ±141 | ±88             | ±183             | ±208              | ±215 | ±241 |
| OSA   |                 |                 |      |                 |                  |                   |      |      |
| PP    | ±64             | ±49             | ±84  | ±43             | ±78              | ±80               | ±76  | ±106 |
| IND   | ±63             | ±87             | ±207 | ±65             | ±146             | ±163              | ±189 | ±251 |
| ROAD  | ±52             | ±61             | ±105 | ±42             | ±96              | ±97               | ±103 | ±96  |
| OTRA  | ±69             | ±84             | ±121 | ±66             | ±112             | ±112              | ±112 | ±112 |
| DOM   | ±113            | ±190            | ±255 | ±149            | ±309             | ±309              | ±310 | ±310 |

155

(b) 1985

|       | SO <sub>2</sub> | NO <sub>x</sub> | CO   | CO <sub>2</sub> | PM <sub>10</sub> | PM <sub>2.5</sub> | BC   | OC   |
|-------|-----------------|-----------------|------|-----------------|------------------|-------------------|------|------|
| China |                 |                 |      |                 |                  |                   |      |      |
| PP    | ±50             | ±95             | ±82  | ±51             | ±93              | ±93               | ±83  | ±92  |
| IND   | ±56             | ±113            | ±135 | ±52             | ±120             | ±109              | ±165 | ±154 |
| ROAD  | ±61             | ±76             | ±75  | ±48             | ±113             | ±113              | ±114 | ±113 |
| OTRA  | ±68             | ±144            | ±154 | ±71             | ±152             | ±152              | ±170 | ±170 |
| DOM   | ±78             | ±174            | ±241 | ±135            | ±279             | ±291              | ±283 | ±328 |
| India |                 |                 |      |                 |                  |                   |      |      |
| PP    | ±54             | ±104            | ±93  | ±47             | ±105             | ±105              | ±104 | ±71  |
| IND   | ±53             | ±120            | ±211 | ±88             | ±177             | ±206              | ±190 | ±274 |
| ROAD  | ±63             | ±74             | ±85  | ±50             | ±140             | ±141              | ±145 | ±136 |
| OTRA  | ±67             | ±92             | ±86  | ±53             | ±139             | ±117              | ±110 | ±98  |
| DOM   | ±97             | ±208            | ±265 | ±171            | ±319             | ±324              | ±321 | ±328 |
| Japan |                 |                 |      |                 |                  |                   |      |      |
| PP    | ±41             | ±78             | ±74  | ±37             | ±83              | ±83               | ±65  | ±73  |
| IND   | ±45             | ±82             | ±62  | ±42             | ±96              | ±102              | ±107 | ±124 |
| ROAD  | ±31             | ±31             | ±59  | ±34             | ±69              | ±69               | ±71  | ±68  |
| OTRA  | ±48             | ±123            | ±119 | ±62             | ±116             | ±116              | ±116 | ±116 |
| DOM   | ±52             | ±66             | ±75  | ±44             | ±78              | ±75               | ±70  | ±111 |
| SEA   |                 |                 |      |                 |                  |                   |      |      |
| PP    | ±61             | ±81             | ±123 | ±43             | ±100             | ±101              | ±99  | ±200 |
| IND   | ±61             | ±120            | ±268 | ±98             | ±178             | ±213              | ±202 | ±286 |
| ROAD  | ±62             | ±79             | ±111 | ±52             | ±115             | ±115              | ±119 | ±113 |
| OTRA  | ±77             | ±141            | ±122 | ±66             | ±151             | ±151              | ±151 | ±151 |
| DOM   | ±114            | ±210            | ±237 | ±166            | ±316             | ±317              | ±318 | ±319 |
| OEA   |                 |                 |      |                 |                  |                   |      |      |
| PP    | ±60             | ±109            | ±95  | ±51             | ±97              | ±97               | ±96  | ±81  |
| IND   | ±56             | ±108            | ±96  | ±57             | ±115             | ±114              | ±115 | ±116 |
| ROAD  | ±109            | ±116            | ±120 | ±89             | ±150             | ±152              | ±157 | ±146 |
| OTRA  | ±75             | ±126            | ±126 | ±71             | ±116             | ±116              | ±116 | ±116 |
| DOM   | ±90             | ±108            | ±124 | ±82             | ±164             | ±163              | ±165 | ±171 |
| OSA   |                 |                 |      |                 |                  |                   |      |      |
| PP    | ±63             | ±69             | ±80  | ±39             | ±90              | ±92               | ±80  | ±76  |
| IND   | ±57             | ±114            | ±240 | ±86             | ±176             | ±205              | ±214 | ±272 |
| ROAD  | ±62             | ±72             | ±92  | ±50             | ±112             | ±112              | ±115 | ±112 |
| OTRA  | ±62             | ±95             | ±103 | ±51             | ±88              | ±91               | ±109 | ±91  |
| DOM   | ±115            | ±225            | ±286 | ±185            | ±340             | ±341              | ±341 | ±342 |

(c) 1955

|       | SO <sub>2</sub> | NO <sub>x</sub> | CO   | CO <sub>2</sub> | PM <sub>10</sub> | PM <sub>2.5</sub> | BC   | OC   |
|-------|-----------------|-----------------|------|-----------------|------------------|-------------------|------|------|
| China |                 |                 |      |                 |                  |                   |      |      |
| PP    | ±126            | ±140            | ±129 | ±105            | ±131             | ±131              | ±124 | ±131 |
| IND   | ±124            | ±160            | ±176 | ±101            | ±127             | ±121              | ±188 | ±166 |
| ROAD  | ±91             | ±101            | ±90  | ±60             | ±145             | ±145              | ±146 | ±144 |
| OTRA  | ±138            | ±182            | ±191 | ±118            | ±182             | ±182              | ±200 | ±200 |
| DOM   | ±137            | ±268            | ±325 | ±225            | ±391             | ±397              | ±406 | ±426 |
| India |                 |                 |      |                 |                  |                   |      |      |
| PP    | ±110            | ±128            | ±127 | ±91             | ±119             | ±119              | ±116 | ±127 |
| IND   | ±103            | ±202            | ±305 | ±177            | ±263             | ±293              | ±272 | ±333 |
| ROAD  | ±84             | ±84             | ±105 | ±56             | ±149             | ±150              | ±152 | ±146 |
| OTRA  | ±139            | ±145            | ±138 | ±109            | ±185             | ±174              | ±170 | ±158 |
| DOM   | ±162            | ±265            | ±315 | ±227            | ±377             | ±381              | ±377 | ±382 |
| Japan |                 |                 |      |                 |                  |                   |      |      |
| PP    | ±109            | ±123            | ±124 | ±92             | ±144             | ±145              | ±135 | ±130 |
| IND   | ±97             | ±125            | ±62  | ±88             | ±110             | ±114              | ±151 | ±128 |
| ROAD  | ±52             | ±38             | ±66  | ±35             | ±81              | ±81               | ±83  | ±81  |
| OTRA  | ±104            | ±122            | ±121 | ±107            | ±184             | ±173              | ±172 | ±155 |
| DOM   | ±89             | ±167            | ±191 | ±144            | ±236             | ±276              | ±290 | ±307 |
| SEA   |                 |                 |      |                 |                  |                   |      |      |
| PP    | ±142            | ±121            | ±133 | ±100            | ±132             | ±134              | ±126 | ±124 |
| IND   | ±137            | ±239            | ±333 | ±218            | ±310             | ±327              | ±323 | ±339 |
| ROAD  | ±89             | ±91             | ±131 | ±69             | ±136             | ±136              | ±138 | ±134 |
| OTRA  | ±147            | ±182            | ±163 | ±118            | ±191             | ±191              | ±191 | ±191 |
| DOM   | ±183            | ±266            | ±282 | ±221            | ±369             | ±369              | ±369 | ±370 |
| OEA   |                 |                 |      |                 |                  |                   |      |      |
| PP    | ±112            | ±154            | ±145 | ±105            | ±146             | ±146              | ±142 | ±131 |
| IND   | ±113            | ±137            | ±146 | ±100            | ±138             | ±138              | ±141 | ±152 |
| ROAD  | ±108            | ±129            | ±130 | ±88             | ±164             | ±165              | ±169 | ±161 |
| OTRA  | -               | -               | -    | -               | -                | -                 | -    | -    |
| DOM   | ±140            | ±167            | ±208 | ±143            | ±262             | ±290              | ±296 | ±318 |
| OSA   |                 |                 |      |                 |                  |                   |      |      |
| PP    | ±108            | ±108            | ±107 | ±87             | ±137             | ±138              | ±113 | ±118 |
| IND   | ±144            | ±227            | ±329 | ±189            | ±274             | ±311              | ±313 | ±338 |
| ROAD  | ±89             | ±78             | ±90  | ±64             | ±111             | ±111              | ±115 | ±111 |
| OTRA  | ±143            | ±143            | ±155 | ±101            | ±129             | ±125              | ±139 | ±125 |
| DOM   | ±180            | ±282            | ±336 | ±242            | ±394             | ±394              | ±394 | ±394 |

160 **Table S3: Uncertainties [%] of emissions of NMVOC for each sector in China, India, Japan, Southeast Asia (SEA), East Asia other than China and Japan (OEA), and South Asia other than India (OSA) in 2015, 1985, and 1955. Abbreviations for sectors are the same as in Table S2 except for EXT = Extraction processes, SLV = Solvent and paint use, and WST = Waste treatment. Note that uncertainties of emissions from non-combustion sources in Japan based on MOEJ (2017) were not assessed in this study. For OTRA of OEA in 1955, no emissions were estimated.**

|             | China | India | Japan | SEA  | OEA  | OSA  |
|-------------|-------|-------|-------|------|------|------|
| <b>2015</b> |       |       |       |      |      |      |
| PP          | ±75   | ±110  | ±90   | ±120 | ±80  | ±86  |
| IND         | ±101  | ±111  | ±39   | ±136 | ±246 | ±144 |
| ROAD        | ±81   | ±107  | ±52   | ±120 | ±108 | ±132 |
| OTRA        | ±131  | ±151  | ±146  | ±150 | ±154 | ±151 |
| DOM         | ±247  | ±257  | ±62   | ±255 | ±205 | ±261 |
| EXT         | ±130  | ±125  | -     | ±132 | ±141 | ±136 |
| SLV         | ±150  | ±149  | -     | ±156 | ±142 | ±146 |
| WST         | ±173  | ±186  | -     | ±192 | ±188 | ±200 |
| <b>1985</b> |       |       |       |      |      |      |
| PP          | ±74   | ±85   | ±74   | ±126 | ±89  | ±75  |
| IND         | ±94   | ±180  | ±45   | ±193 | ±156 | ±143 |
| ROAD        | ±92   | ±103  | ±56   | ±122 | ±114 | ±118 |
| OTRA        | ±154  | ±117  | ±149  | ±151 | ±154 | ±117 |
| DOM         | ±284  | ±285  | ±70   | ±283 | ±155 | ±291 |
| EXT         | ±135  | ±126  | -     | ±131 | ±137 | ±139 |
| SLV         | ±162  | ±162  | -     | ±160 | ±160 | ±150 |
| WST         | ±200  | ±200  | -     | ±200 | ±200 | ±200 |
| <b>1955</b> |       |       |       |      |      |      |
| PP          | ±121  | ±100  | ±111  | ±131 | ±129 | ±120 |
| IND         | ±169  | ±307  | ±129  | ±328 | ±316 | ±311 |
| ROAD        | ±110  | ±102  | ±60   | ±154 | ±124 | ±117 |
| OTRA        | ±191  | ±129  | ±116  | ±191 | -    | ±163 |
| DOM         | ±338  | ±335  | ±259  | ±330 | ±287 | ±339 |
| EXT         | ±178  | ±168  | -     | ±178 | ±182 | ±179 |
| SLV         | ±162  | ±149  | -     | ±159 | ±146 | ±150 |
| WST         | ±245  | ±245  | -     | ±245 | ±245 | ±245 |

165

170 **Table S4: Uncertainties [%] of emissions of NH<sub>3</sub> for each sector in China, India, Japan, Southeast Asia (SEA), East Asia other than China and Japan (OEA), and South Asia other than India (OSA) in 2015, 1985, and 1955. Abbreviations for sectors are the same as in Table S2 except for MISC = Human (perspiration and respiration) and latrines. Note that uncertainties of emissions from agricultural sources based on REASv1.1 (Yamaji et al., 2004; Yan et al., 2003) were not assessed in this study. For OTRA of OEA in 1955, no emissions were estimated.**

|      | China | India | Japan | SEA  | OEA  | OSA  |
|------|-------|-------|-------|------|------|------|
| 2015 |       |       |       |      |      |      |
| PP   | ±133  | ±237  | ±149  | ±217 | ±113 | ±161 |
| IND  | ±106  | ±155  | ±176  | ±177 | ±137 | ±145 |
| ROAD | ±117  | ±117  | ±114  | ±145 | ±119 | ±142 |
| OTRA | ±163  | ±170  | ±164  | ±170 | ±174 | ±170 |
| DOM  | ±261  | ±261  | ±110  | ±261 | ±287 | ±262 |
| MISC | ±130  | ±131  | ±131  | ±131 | ±131 | ±131 |
| 1985 |       |       |       |      |      |      |
| PP   | ±140  | ±128  | ±157  | ±276 | ±133 | ±134 |
| IND  | ±99   | ±187  | ±202  | ±224 | ±138 | ±151 |
| ROAD | ±103  | ±121  | ±102  | ±125 | ±120 | ±131 |
| OTRA | ±174  | ±148  | ±168  | ±171 | ±174 | ±164 |
| DOM  | ±290  | ±290  | ±130  | ±290 | ±282 | ±292 |
| MISC | ±132  | ±132  | ±132  | ±132 | ±132 | ±132 |
| 1955 |       |       |       |      |      |      |
| PP   | ±181  | ±153  | ±171  | ±154 | ±181 | ±171 |
| IND  | ±122  | ±333  | ±186  | ±339 | ±309 | ±339 |
| ROAD | ±125  | ±154  | ±116  | ±180 | ±133 | ±160 |
| OTRA | ±210  | ±201  | ±202  | ±210 | -    | ±184 |
| DOM  | ±339  | ±339  | ±332  | ±337 | ±337 | ±339 |
| MISC | ±133  | ±133  | ±133  | ±133 | ±133 | ±133 |



## References

- Bo, Y., Cai, H., and Xie, S. D.: Spatial and temporal variation of historical anthropogenic NMVOCs emission inventories in  
175 China, *Atmos. Chem. Phys.*, 8, 7297–7316, <https://doi.org/10.5194/acp-8-7297-2008>, 2008.
- Fukui, T., Kokuryo, K., Baba, T., and Kannari, A.: Updating EAGrid2000-Japan emissions inventory based on the recent  
emission trends (in Japanese), *J. Jpn. Soc. Atmos. Environ.*, 2, 117–125, <https://doi.org/10.11298/taiki.49.117>, 2014.
- Garg, A., Shukla, P. R., and Kaphe, M.: The sectoral trends of multigas emissions inventory of India, *Atmos. Environ.*, 40,  
4608–4620, <https://doi.org/10.1016/j.atmosenv.2006.03.045>, 2006.
- 180 Huang, X., Song, Y., Li, M., Li, J., Huo, Q., Cai, X., Zhu, T., Hu, M., and Zhang, H.: A high-resolution ammonia emission  
inventory in China, *Global Biogeochem. Cy.*, 26, GB1030, <https://doi.org/10.1029/2011GB004161>, 2012.
- Kang, Y., Liu, M., Song, Y., Huang, X., Yao, H., Cai, X., Zhang, H., Kang, L., Liu, X., Yan, X., He, H., Zhang, Q., Shao,  
M., and Zhu, T.: High-resolution ammonia emissions inventories in China from 1980 to 2012, *Atmos. Chem. Phys.*, 16,  
2043–2058, <https://doi.org/10.5194/acp-16-2043-2016>, 2016.
- 185 Kannari, A., Baba, T., and Hayami, H.: Estimation of ammonia emissions in Japan (in Japanese), *J. Jpn. Soc. Atmos.  
Environ.*, 36, 29–38, <https://doi.org/10.11298/taiki1995.36.29>, 2001.
- Kannari, A., Tonooka, Y., Baba, T., and Murano, K.: Development of multiple-species 1 km × 1 km resolution hourly basis  
emissions inventory for Japan, *Atmos. Environ.*, 41, 3428–3439, <https://doi.org/10.1016/j.atmosenv.2006.12.015>, 2007.
- Kato, N. and Akimoto, H.: Anthropogenic emissions of SO<sub>2</sub> and NO<sub>x</sub> in Asia: emissions inventories, *Atmos. Environ.*, 26,  
190 2997–3017, [https://doi.org/10.1016/0960-1686\(92\)90291-R](https://doi.org/10.1016/0960-1686(92)90291-R), 1992.
- Klimont, Z., Smith, S. J., and Cofala, J.: The last decade of global anthropogenic sulfur dioxide: 2000–2011 emissions,  
*Environ. Res., Lett.*, 8, 014003, <https://doi.org/10.1088/1748-9326/8/1/014003>, 2013.
- Klimont, Z., Kupiainen, K., Heyes, C., Purohit, P., Cofala, J., Rafaj, P., Borcken-Kleefeld, J., and Schöpp, W.: Global  
anthropogenic emissions of particulate matter including black carbon, *Atmos. Chem. Phys.*, 17, 8681–8723,  
195 <https://doi.org/10.5194/acp-17-8681-2017>, 2017.
- Lei, Y., Zhang, Q., He, K. B., and Streets, D. G.: Primary anthropogenic aerosol emission trends for China, 1990–2005,  
*Atmos. Chem. Phys.*, 11, 931–954, <https://doi.org/10.5194/acp-11-931-2011>, 2011.
- Li, M., Zhang, Q., Zheng, B., Tong, D., Lei, Y., Liu, F., Hong, C., Kang, S., Yan, L., Zhang, Y., Bo, Y., Su, H., Cheng, Y.,  
and He, K.: Persistent growth of anthropogenic non-methane volatile organic compound (NMVOC) emissions in China  
200 during 1990–2017: drivers, speciation and ozone formation potential, *Atmos. Chem. Phys.*, 19, 8897–8913,  
<https://doi.org/10.5194/acp-19-8897-2019>, 2019.
- Lu, Z., Zhang, Q., and Streets, D. G.: Sulfur dioxide and primary carbonaceous aerosol emissions in China and India, 1996–  
2010, *Atmos. Chem. Phys.*, 11, 9839–9864, <https://doi.org/10.5194/acp-11-9839-2011>, 2011.

- Ma, Q., Cai, S., Wang, S., Zhao, B., Martin, R. V., Brauer, M., Cohen, A., Jiang, J., Zhou, W., Hao, J., Frostad, J.,  
205 Forouzanfar, M. H., and Burnett, R. T.: Impacts of coal burning on ambient PM<sub>2.5</sub> pollution in China, *Atmos. Chem. Phys.*,  
17, 4477–4491, <https://doi.org/10.5194/acp-17-4477-2017>, 2017.
- MOEJ (Ministry of Environment of Japan): Report on Volatile Organic Compound (VOC) Emission Inventory Compiled (in  
Japanese), available at: <http://www.env.go.jp/air/osen/voc/inventory.html> (last access: 23 November 2019), 2017.
- Morth (Ministry of Road Transport & Highways of India): Road Transport Yearbook (2001–2015), Transport Research  
210 Wing, Delhi, 2003–2017.
- Pandey, A., Sadavarte, P., Rao, A. B., and Venkataraman, C.: Trends in multi-pollutant emissions from a technology-linked  
inventory for India: II. Residential, agricultural and informal industry sectors, 99, 341–352,  
<https://doi.org/10.1016/j.atmosenv.2014.09.080>, 2014.
- Reddy, M. S. and Venkataraman, C.: Inventory of aerosol and sulphur dioxide emissions from India: I – Fossil fuel  
215 combustion, *Atmos. Environ.*, 36, 677–697, [https://doi.org/10.1016/S1352-2310\(01\)00463-0](https://doi.org/10.1016/S1352-2310(01)00463-0), 2002a.
- Reddy, M. S. and Venkataraman, C.: Inventory of aerosol and sulphur dioxide emissions from India. Part II – biomass  
combustion, *Atmos. Environ.*, 36, 699–712, [https://doi.org/10.1016/S1352-2310\(01\)00464-2](https://doi.org/10.1016/S1352-2310(01)00464-2), 2002b.
- Sadavarte, P. and Venkataraman, C.: Trends in multi-pollutant emissions from a technology-linked inventory for India: I.  
Industry and transport sectors, *Atmos. Environ.*, 99, 353–364, <https://doi.org/10.1016/j.atmosenv.2014.09.081>, 2014.
- 220 Sharma, S., Goel, A., Gupta, D., Kumar, A., Mishra, A., Kundu, S., Chatani, S., and Klimont, Z.: Emission inventory of non-  
methane volatile organic compounds from anthropogenic sources in India, *Atmos. Environ.*, 102, 209–219,  
<https://doi.org/10.1016/j.atmosenv.2014.11.070>, 2015.
- Smith, S. J., van Aardenne, J., Klimont, Z., Andres, R. J., Volke, A., and Delgado Arias, S.: Anthropogenic sulfur dioxide  
emissions: 1850–2005, *Atmos. Chem. Phys.*, 11, 1101–1116, <https://doi.org/10.5194/acp-11-1101-2011>, 2011.
- 225 Streets, D. G., Tsai, N. Y., Akimoto, H., and Oka, K.: Sulfur dioxide emissions in Asia in the period 1985–1997, 34, 4413–  
4424, [https://doi.org/10.1016/S1352-2310\(00\)00187-4](https://doi.org/10.1016/S1352-2310(00)00187-4), 2000.
- Streets, D. G., Bond, T. C., Carmichael, G. R., Fernandes, S. D., Fu, Q., He, D., Klimont, Z., Nelson, S. M., Tsai, N. Y.,  
Wang, M. Q., Woo, J.-H., and Yarber, K. F.: An inventory of gaseous and primary aerosol emissions in Asia in the year  
2000, *J. Geophys. Res.*, 108, 8809, <https://doi.org/10.1029/2002JD003093>, 2003.
- 230 Streets, D. G., Zhang, Q., Wang, L., He, K., Hao, J., Wu, Y., Tang, Y., and Carmichael, G. R.: Revisiting China's CO  
emissions after the Transport and Chemical Evolution over the Pacific (TRACE-P) mission: Synthesis of inventories,  
atmospheric modeling, and observations, 111, D14306, <https://doi.org/10.1029/2006JD007118>, 2006.
- Sugiyama, T., Nansai, K., Tohno, S., and Yamamoto, K.: Compilation and application of a primary PM<sub>2.5</sub> emissions  
inventory with high sectoral resolution in Japan, *Atmos. Environ.*, 43, 759–768,  
235 <https://doi.org/10.1016/j.atmosenv.2008.11.003>, 2009.

- Venkataraman, C., Brauer, M., Tibrewal, K., Sadavarte, P., Ma, Q., Cohen, A., Chaliyakunnel, S., Frostad, J., Klimont, Z., Martin, R. V., Millet, D. B., Philip, S., Walker, K., and Wang, S.: Source influence on emission pathways and ambient PM<sub>2.5</sub> pollution over India (2015–2050), *Atmos. Chem. Phys.*, 18, 8017–8039, <https://doi.org/10.5194/acp-18-8017-2018>, 2018.
- 240 Wang, S. X., Zhao, B., Cai, S. Y., Klimont, Z., Nielsen, C. P., Morikawa, T., Woo, J. H., Kim, Y., Fu, X., Xu, J. Y., Hao, J. M., and He, K. B.: Emission trends and mitigation options for air pollutants in East Asia, *Atmos. Chem. Phys.*, 14, 6571–6603, <https://doi.org/10.5194/acp-14-6571-2014>, 2014.
- Wei, W., Wang, S., Chatani, S., Klimont, Z., Cofala, J., and Hao, J.: Emission and speciation of non-methane volatile organic compounds from anthropogenic sources in China, *Atmos. Environ.*, 42, 4976–4988, <https://doi.org/10.1016/j.atmosenv.2008.02.044>, 2008.
- 245 Xia, Y., Zhao, Y., and Nielsen, C. P.: Benefits of China's efforts in gaseous pollutant control indicated by the bottom-up emissions and satellite observations 2000–2014, 136, 43–53, <https://doi.org/10.1016/j.atmosenv.2016.04.013>, 2016.
- Yamaji, K., Ohara, T., and Akimoto, H.: Regional-specific emission inventory for NH<sub>3</sub>, N<sub>2</sub>O, and CH<sub>4</sub> via animal farming in South, Southeast, and East Asia, *Atmos. Environ.*, 38, 7111–7121, <https://doi.org/10.1016/j.atmosenv.2004.06.045>, 2004.
- 250 Yan, X., Akimoto, H., and Ohara, T.: Estimation of nitrous oxide, nitric oxide, and ammonia emissions from croplands in East, Southeast, and South Asia, *Global Change Biol.*, 9, 1080–1096, <https://doi.org/10.1046/j.1365-2486.2003.00649.x>, 2003.
- Zhang, Q., Streets, D. G., Carmichael, G. R., He, K. B., Huo, H., Kannari, A., Klimont, Z., Park, I. S., Reddy, S., Fu, J. S., Chen, D., Duan, L., Lei, Y., Wang, L. T., and Yao, Z. L.: Asian emissions in 2006 for the NASA INTEX-B mission, *Atmos. Chem. Phys.*, 9, 5131–5153, <https://doi.org/10.5194/acp-9-5131-2009>, 2009.
- 255 Zhao, Y., Nielsen, C. P., Lei, Y., McElroy, M. B., and Hao, J.: Quantifying the uncertainties of a bottom-up emission inventory of anthropogenic atmospheric pollutants in China, *Atmos. Chem. Phys.*, 11, 2295–2308, <https://doi.org/10.5194/acp-11-2295-2011>, 2011.
- Zhao, Y., Nielsen, C. P., McElroy, M. B., Zhang, L., and Zhang, J.: CO emissions in China: uncertainties and implications of improved energy efficiency and emission control, *Atmos. Environ.*, 49, 103–113, <https://doi.org/10.1016/j.atmosenv.2011.12.015>, 2012.
- 260 Zhao, Y., Zhang, J., and Nielsen, C. P.: The effects of recent control policies on trends in emissions of anthropogenic atmospheric pollutants and CO<sub>2</sub> in China, *Atmos. Chem. Phys.*, 13, 487–508, <https://doi.org/10.5194/acp-13-487-2013>, 2013.
- Zheng, B., Tong, D., Li, M., Liu, F., Hong, C., Geng, G., Li, H., Li, X., Peng, L., Qi, J., Yan, L., Zhang, Y., Zhao, H., Zheng, Y., He, K., and Zhang, Q.: Trends in China's anthropogenic emissions since 2010 as the consequence of clean air actions, *Atmos. Chem. Phys.*, 18, 14095–14111, <https://doi.org/10.5194/acp-18-14095-2018>, 2018.
- 265
